# Supplementary material for: Altered Gene Expression Profiles of Wheat Genotypes against Fusarium Head Blight
Source: MDPI journal article supplement (doi:10.3390/toxins7020604), 2015-02-16
Supplement: s1 [file s1]

## Sheet: Table S1
Table S1. F.g-responsive differentially up-regulated genes in three wheat genotypes specific to three and seven days after inoculation (dai).
Differentially up-regulated genes at 3 dai
Gene classes	Fold Change 3 dai			Probe ID	Annotation
	Gamenya	Sumai 3	Nobeokabouzu-komugi
Genes related to cell wall defense
Inhibition of fungal glycases	3.93693	2.14254	3.16489	32649	LOC_Os11g47580.1|11981.m08558|protein Xylanase inhibitor protein 1 precursor, putative, expressed
	8.10659	2.97692	9.87613	18746	LOC_Os01g71090.1|11971.m13153|protein xylanase inhibitor TAXI-IV, putative, expressed
Degradation of fungal cell wall	7.09404	2.95152	10.1261	17491	LOC_Os01g71090.1|11971.m13153|protein xylanase inhibitor TAXI-IV, putative, expressed
	3.66755	2.32459	29.3448	5922	LOC_Os01g71380.1|11971.m13181|protein Glucan endo-1,3-beta-glucosidase GII precursor, putative, expressed
Secondary metabolism & detoxification
Glutathione S-transferase	4.01421	2.21267	43.412	18255	LOC_Os02g21460.1|11972.m07386|protein glutathione S-transferase, putative, expressed
	3.33475	2.93071	48.2988	8403	LOC_Os01g27390.1|11971.m09189|protein glutathione S-transferase GSTF2, putative, expressed
Miscellaneous defense related genes
Pathogenesis related protein	2.91932	2.09056	20.0061	15605	LOC_Os11g11780.1|11981.m05370|protein serine/threonine protein kinase, putative, expressed
	6.07063	6.62384	208.778	20297	LOC_Os10g11500.1|11980.m04472|protein Pathogenesis-related protein PRB1-2 precursor, putative, expressed
	12.4895	8.17677	272.577	27669	LOC_Os10g11500.1|11980.m04472|protein Pathogenesis-related protein PRB1-2 precursor, putative, expressed
Transcription & signalling
	2.30315	2.60022	9.40111	12554	LOC_Os07g35260.1|11977.m07782|protein Protein kinase domain containing protein, expressed
	2.63551	2.28308	10.9062	37103	LOC_Os03g06330.1|11973.m06153|protein Protein kinase APK1B, chloroplast precursor, putative, expressed
	2.39356	2.38149	12.024	14241	LOC_Os04g44550.1|11974.m09414|protein coiled-coil-helix-coiled-coil-helix domain containing protein, putative, expressed
	2.88599	2.71261	12.0636	31573	LOC_Os01g39330.1|11971.m10210|protein Helix-loop-helix DNA-binding domain containing protein, expressed
Un catagorized	3.82695	3.14194	10.1039	22918	LOC_Os12g38920.1|11982.m07677|protein Heparanase-like protein 2 precursor, putative, expressed
	2.9112	2.65634	10.5368	15303	LOC_Os12g38920.1|11982.m07677|protein Heparanase-like protein 2 precursor, putative, expressed
	9.3353	5.25714	201.396	28513	LOC_Os12g26290.3|11982.m26906|protein alpha-dioxygenase, putative, expressed
	3.71796	2.72027	26.9857	3929	LOC_Os11g38160.1|11981.m07663|protein Sugar transporter family protein, expressed
	6.40927	3.4825	11.6689	12769	LOC_Os07g41340.1|11977.m08370|protein B12D protein, expressed
	7.67692	2.71654	9.32211	36606	LOC_Os07g41340.1|11977.m08370|protein B12D protein, expressed
	3.03074	2.06799	8.06651	35665	LOC_Os07g39350.1|11977.m08177|protein Sugar transporter family protein, expressed
	4.38685	2.14549	6.4626	37824	LOC_Os07g37320.1|11977.m07982|protein Glucose transporter, putative, expressed
	4.56593	7.23853	7.81447	20381	LOC_Os06g36390.2|11976.m08175|protein expressed protein
	3.16876	2.80378	9.62418	37735	LOC_Os06g29220.1|11976.m07466|protein Formate dehydrogenase, mitochondrial precursor, putative, expressed
	2.48142	2.3219	6.25252	844	LOC_Os06g08032.1|11976.m05526|protein oxidoreductase, 2OG-Fe oxygenase family protein
	3.56161	2.23667	11.775	2635	LOC_Os03g55320.1|11973.m10447|protein protein phosphatase 2C family protein, putative, expressed
	2.65808	2.57167	4.28278	22648	LOC_Os02g47090.1|11972.m09744|protein POT family protein, expressed
	2.39358	2.18294	6.14101	33604	LOC_Os02g07880.1|11972.m06134|protein expressed protein
	3.65767	2.93277	7.27302	21395	LOC_Os01g74490.1|11971.m13474|protein heavy metal-associated domain containing protein, expressed
	2.27088	2.17257	9.15681	21587	LOC_Os01g61990.1|11971.m12322|protein ankyrin repeat family protein, putative, expressed
	2.59746	3.65158	16.084	9937	LOC_Os01g48620.1|11971.m11052|protein expressed protein
	2.17426	2.04166	2.986	33872	LOC_Os01g25189.3|11971.m97505|protein Ergosterol biosynthesis ERG4/ERG24 family protein, expressed
	2.47674	2.78583	6.23955	22861	LOC_Os01g16146.1|11971.m08212|protein phenazine biosynthesis protein PhzF family protein, expressed
Unknown
	2.04718	2.87843	38.4635	21752
	3.01645	2.49247	14.6718	33116
	6.12109	4.08473	45.1096	32398
	2.6153	2.20154	18.7706	4200
	3.52685	2.84189	11.1509	23062
Differentially up-regulated genes at 7 dai
Gene classes	Fold Change 3 dai			Probe ID	Annotation
	Gamenya	Sumai 3	Nobeokabouzu-komugi
Proteolysis
	2.21286	2.62397	3.0338	34263	LOC_Os03g27590.1|11973.m08086|protein Serine carboxypeptidase family protein, expressed
Secondary metabolism & detoxification
Cytochrome P450s	2.61361	2.13275	2.27896	8496	LOC_Os08g43440.1|11978.m08318|protein Cytochrome P450 family protein, expressed
	6.22245	4.82119	14.8369	21912	LOC_Os02g09200.1|11972.m06217|protein Cytochrome P450 family protein, expressed
	2.47788	3.06539	3.72987	31831	LOC_Os01g43710.1|11971.m10633|protein Cytochrome P450 72A1, putative, expressed
Miscellanneous defense related genes
	4.77249	3.64484	4.86849	13072	LOC_Os03g18850.1|11973.m07305|protein Pathogenesis-related protein 1, putative, expressed
Transcription & signalling
	3.10697	3.22171	2.44888	15753	LOC_Os01g53040.1|11971.m11476|protein WRKY DNA binding domain containing protein, expressed
Un categorized
	3.6073	5.52196	3.49022	6557	LOC_Os12g25090.2|11982.m56494|protein expressed protein
	3.76628	4.07512	6.51981	20832	LOC_Os12g25090.2|11982.m56494|protein expressed protein
	2.54381	2.82028	2.35805	1237	LOC_Os12g06660.1|11982.m04656|protein Actin-7, putative, expressed
	2.13458	2.56362	2.81733	23917	LOC_Os11g02200.1|11981.m04419|protein expressed protein
	2.27026	2.20119	4.06954	13011	LOC_Os10g39090.1|11980.m50435|protein expressed protein
	3.35185	2.68871	4.60567	7520	LOC_Os08g38440.1|11978.m07828|protein C2 domain containing protein, expressed
	3.29029	2.74869	2.61298	36762	LOC_Os06g08023.1|11976.m05525|protein oxidoreductase, 2OG-Fe oxygenase family protein
	3.13902	2.45926	2.21503	2503	LOC_Os05g50090.1|11975.m09078|protein oxidoreductase, 2OG-Fe oxygenase family protein, expressed
	2.43266	2.95361	3.86577	18109	LOC_Os04g36058.2|11974.m35574|protein expressed protein
	6.58992	5.37854	2.65729	26886	LOC_Os04g31710.1|11974.m08271|protein expressed protein
	5.95636	5.22429	2.6336	29943	LOC_Os04g31710.1|11974.m08271|protein expressed protein
	2.00012	3.17201	3.97984	26528	LOC_Os04g29550.1|11974.m08064|protein Ripening-related protein, putative, expressed
	2.70019	2.34925	4.86131	34275	LOC_Os04g01230.2|11974.m35229|protein phosphoglycerate mutase, putative, expressed
	2.35318	2.49752	4.69623	3211	LOC_Os03g21640.2|11973.m34860|protein expressed protein
	2.51279	2.71411	2.91975	29994	LOC_Os03g07190.1|11973.m06236|protein expressed protein
	2.00689	2.29792	3.55654	24052	LOC_Os02g51150.2|11972.m33453|protein Protein SUR2, putative, expressed
	2.0786	2.50169	2.19963	6686	LOC_Os02g36340.2|11972.m33397|protein Riboflavin biosynthesis protein ribA, chloroplast precursor, putative, expressed
	4.36835	7.49535	2.18091	27898	LOC_Os02g25780.1|11972.m07722|protein expressed protein
	2.54451	2.4959	4.23069	6883	LOC_Os02g24080.4|11972.m33379|protein SNAP25 homologous protein SNAP30, putative, expressed
	2.09106	2.55878	2.22871	15866	LOC_Os02g20970.1|11972.m07337|protein C2 domain containing protein, expressed
	2.21778	2.64173	2.9422	4766	LOC_Os02g12480.1|11972.m06496|protein expressed protein
	3.40616	3.69793	7.11608	20465	LOC_Os02g09810.2|11972.m33591|protein amino acid transporter family protein, putative, expressed
	2.57473	2.69681	2.52726	36664	LOC_Os01g64630.1|11971.m43291|protein Actin-7, putative, expressed
	2.28018	3.11044	4.31989	30196	LOC_Os01g63210.1|11971.m12438|protein SOUL heme-binding family protein, putative, expressed
	2.60281	4.72634	4.68598	25307	LOC_Os01g57480.1|11971.m11899|protein D-mannose binding lectin family protein, expressed
	2.40173	2.33659	4.65494	23794	LOC_Os01g49600.1|11971.m11146|protein hypothetical protein
	8.45723	10.7982	16.9332	33688	LOC_Os01g46600.1|11971.m10856|protein seed maturation protein PM41, putative, expressed
Unknown
	4.15987	5.92515	6.24995	14410
	4.02196	3.93362	6.95154	3267
	4.10188	4.1342	10.9696	16219
	2.66016	2.42166	3.02486	32152
	2.8051	8.6912	6.91407	14749
	2.24086	2.4805	2.45083	34109

## Sheet: Table S2
Table S2. F.g-responsive differentially up regulated genes commonly expressed in three wheat genotypes at both treatment time points (three and seven days after inoculation).
Gene functional classes	Fold Change 3 dai			Fold Change 7 dai			Probe ID	Annotation
	Gamenya	Sumai 3	Nobeokabouzu-komugi	Gamenya	Sumai 3	Nobeokabouzu-kimugi
JA and ET related genes
Lipid metabolism & oxylipins biosynthesis	2.69674	4.07403	56.1681	3.23004	3.99404	3.79579	5341	LOC_Os06g11210.1|11976.m05838|protein 12-oxophytodienoate reductase 2, putative, expressed
JA	2.91361	5.09071	20.5588	2.41854	3.66552	5.42474	10327	LOC_Os11g05660.1|11981.m04763|protein F-box domain containing protein, expressed
	5.3414	3.25195	14.1744	4.0198	2.85123	13.2992	25683	LOC_Os07g37400.1|11977.m07990|protein F-box domain containing protein, expressed
Lipoxygenase	28.7909	6.86547	414.452	28.1342	52.9652	30.7765	23642	LOC_Os01g62010.1|11971.m12324|protein Monoglyceride lipase, putative, expressed
Lipid metabolism. TAG synthesis	29.9748	7.14779	948.929	17.7445	29.1017	106.441	24281	LOC_Os08g28880.1|11978.m06893|protein Patatin-like phospholipase family protein
	4.77071	5.16108	46.422	6.90888	13.0894	21.0526	34209	LOC_Os08g37180.1|11978.m07704|protein Patatin-like phospholipase family protein, expressed
	6.57347	7.26363	104.768	5.67293	10.193	18.872	14491	LOC_Os03g20949.1|11973.m07503|protein Phospholipid-transporting ATPase 1, putative, expressed
	6.57555	3.53069	81.3308	4.30571	5.08698	3.25188	15701	LOC_Os05g47660.1|11975.m08838|protein Lipid phosphate phosphatase 2, putative, expressed
	4.38466	2.67285	40.8217	3.42924	4.13836	3.62017	27346	LOC_Os06g39750.2|11976.m32108|protein Fatty acid elongase, putative, expressed
	2.85458	2.15617	8.29428	2.60318	2.34526	2.68445	12348	LOC_Os08g23150.1|11978.m06336|protein Indole-3-glycerol phosphate synthase, chloroplast precursor, putative, expressed
Cystein-rich Antimicrobial peptides (AMPs)
Seine protease inhibitor	2.7309	4.32608	32.9315	4.57752	9.73956	18.1574	9392	LOC_Os01g04050.1|11971.m07041|protein Bowman-Birk type wound-induced proteinase inhibitor WIP1 precursor, putative, expressed
	2.90622	3.89437	20.6293	6.67174	8.98935	9.92158	36816	LOC_Os01g04050.1|11971.m07041|protein Bowman-Birk type wound-induced proteinase inhibitor WIP1 precursor, putative, expressed
	2.08302	2.11017	9.42255	2.37239	2.78627	2.62071	5321	LOC_Os01g03340.1|11971.m06973|protein Bowman-Birk type bran trypsin inhibitor precursor, putative, expressed
Thaumatin	15.6516	6.13029	213.525	17.6986	18.5722	11.3227	2400	LOC_Os12g43380.1|11982.m08112|protein Thaumatin-like protein precursor, putative, expressed
Proteolysis
	6.20451	16.5553	230.715	13.3901	26.3223	45.75	35343	LOC_Os07g34940.1|11977.m07750|protein Eukaryotic aspartyl protease family protein, expressed
Peroxidases
	15.9818	22.7912	273.516	21.8487	21.73	42.4394	4033	LOC_Os05g04490.1|11975.m04982|protein Peroxidase family protein, expressed
	8.44768	10.4519	279.177	11.2131	14.5029	21.3981	24010	LOC_Os07g44499.1|11977.m08670|protein peroxidase, putative, expressed
	6.51938	10.6899	179.225	4.08268	14.2052	21.4789	10222	LOC_Os04g59150.3|11974.m35534|protein Peroxidase 12 precursor, putative, expressed
	5.12597	3.12848	32.4388	8.07461	3.16136	2.14818	23181	LOC_Os07g48030.1|11977.m09018|protein Peroxidase 2 precursor, putative, expressed
	3.49599	2.79237	19.2265	3.85516	2.54159	3.33144	2342	LOC_Os01g22352.1|11971.m08717|protein Peroxidase family protein, expressed
Genes related to cell wall defense
Degradation of fungal cell walls
GH family/ Cellulase family A	4.87848	4.466	32.9996	6.43847	11.1082	10.8875	25207	LOC_Os01g71670.1|11971.m13207|protein Glucan endo-1,3-beta-glucosidase GII precursor, putative, expressed
GH family/ Cellulase family A	7.41802	6.04768	126.855	16.243	7.88336	3.89836	27378	LOC_Os01g71340.1|11971.m13177|protein Glucan endo-1,3-beta-glucosidase, acidic isoform precursor, putative, expressed
GH family/ Cellulase family A	2.65056	2.47887	31.9134	3.26108	7.47427	10.3103	21591	LOC_Os01g71410.1|11971.m13184|protein Glucan endo-1,3-beta-glucosidase GII precursor, putative, expressed
GH family/ Cellulase family A	2.51856	2.64617	24.3548	3.22537	4.79193	10.2619	27885	LOC_Os01g71670.1|11971.m13207|protein Glucan endo-1,3-beta-glucosidase GII precursor, putative, expressed
GH family/ Cellulase family A	3.4691	7.84985	27.2415	7.01473	24.8067	20.1257	8951	LOC_Os06g51060.1|11976.m09629|protein Basic endochitinase 1 precursor, putative, expressed
GH family/ Cellulase family A	3.79114	6.00907	45.5731	6.48572	22.7324	17.4997	32669	LOC_Os06g51060.1|11976.m09629|protein Basic endochitinase 1 precursor, putative, expressed
GH family/ Cellulase family A	2.6079	3.36568	14.5916	4.41543	12.793	8.19316	25831	LOC_Os06g51050.1|11976.m09628|protein Basic endochitinase 1 precursor, putative, expressed
GH family/ Cellulase family A	8.50091	6.66794	119.907	7.20287	11.4762	7.86245	2481	LOC_Os10g39680.1|11980.m06737|protein Acidic 27 kDa endochitinase precursor, putative, expressed
GH family/ Cellulase family A	4.55458	2.83797	41.1223	4.50273	6.87617	3.99808	32447	LOC_Os04g41680.1|11974.m09144|protein Endochitinase A precursor, putative, expressed
GH family/ Cellulase family A	3.37141	3.90298	28.4608	5.19994	6.34227	8.63599	2339	LOC_Os10g39680.1|11980.m06737|protein Acidic 27 kDa endochitinase precursor, putative, expressed
GH family/ Cellulase family A	4.43616	2.6046	46.266	4.67426	6.24001	3.48127	30216	LOC_Os04g41620.1|11974.m09138|protein Endochitinase A precursor, putative, expressed
GH family/ Cellulase family A	4.80639	2.26126	50.9485	4.99026	6.0873	3.08261	36705	LOC_Os04g41620.1|11974.m09138|protein Endochitinase A precursor, putative, expressed
GH family/ Cellulase family A	2.95749	3.27692	16.5436	3.60707	2.56742	4.15615	20877	LOC_Os01g18400.1|11971.m08381|protein 26 kDa endochitinase 1 precursor, putative, expressed
Inhibition of fungal glycases	2.30933	3.8426	14.1519	8.51475	16.2172	20.7228	19756	LOC_Os11g47580.1|11981.m08558|protein Xylanase inhibitor protein 1 precursor, putative, expressed
Inhibition of fungal glycases	4.11543	10.9767	44.1578	4.33935	13.351	18.4571	31408	LOC_Os01g71090.1|11971.m13153|protein xylanase inhibitor TAXI-IV, putative, expressed
Secondary metabolism and detoxification
Cytochrome P450s	34.5889	16.247	445.849	43.6877	88.4724	11.451	21404	LOC_Os05g34380.1|11975.m07669|protein Cytochrome P450 51, putative
Cytochrome P450s	16.6489	6.91835	179.327	13.526	29.919	34.24	5156	LOC_Os02g09200.1|11972.m06217|protein Cytochrome P450 family protein, expressed
Cytochrome P450s	11.12	10.9981	349.087	14.0785	27.9342	24.9666	5725	LOC_Os01g50530.1|11971.m11234|protein Cytochrome P450 family protein
Cytochrome P450s	16.5229	8.49452	137.531	13.5586	15.9002	6.33415	3821	LOC_Os04g48200.1|11974.m09758|protein Cytochrome P450 family protein, expressed
Cytochrome P450s	7.93742	5.81216	160.492	7.45147	6.73382	8.41214	29550	LOC_Os01g43750.1|11971.m10637|protein Cytochrome P450 family protein, expressed
Cytochrome P450s	2.96629	5.95951	47.8835	2.65379	6.01799	10.5737	6528	LOC_Os08g01480.1|11978.m04296|protein Cytochrome P450 71C4, putative, expressed
Cytochrome P450s	6.71508	11.9491	100.451	9.03636	4.62818	25.1515	37800	LOC_Os01g43844.1|11971.m97528|protein Cytochrome P450 family protein, expressed
Cytochrome P450s	2.95306	3.035	18.8454	2.4158	4.60931	6.8536	14506	LOC_Os01g59100.1|11971.m42505|protein glucosyltransferase, putative, expressed
Cytochrome P450s	3.82744	2.38622	10.7021	2.0984	2.0368	2.41396	7470	LOC_Os02g09400.1|11972.m06237|protein Cytochrome P450 family protein, expressed
ABC transporter	12.0146	9.41723	201.161	12.8562	21.1409	36.7235	29681	LOC_Os11g37700.1|11981.m07615|protein ABC transporter, putative, expressed
ABC transporter	11.129	8.85205	270.537	7.40366	10.1615	17.6792	9556	LOC_Os08g29570.1|11978.m06961|protein PDR-type ABC transporter 1, putative, expressed
ABC transporter	5.38945	6.36973	55.0576	5.52537	7.9468	27.6424	18498	LOC_Os01g24010.1|11971.m08871|protein PDR5-like ABC transporter, putative, expressed
ABC transporter	7.44095	2.79644	95.1632	3.63079	4.97865	7.7316	4023	LOC_Os10g11354.1|11980.m04463|protein MATE efflux family protein, expressed
ABC transporter	3.49101	3.71365	25.2119	2.942	4.23104	10.7415	27287	LOC_Os08g29570.1|11978.m06961|protein PDR-type ABC transporter 1, putative, expressed
ABC transporter	4.75933	2.8425	18.5039	2.91673	3.24078	4.81256	14337	LOC_Os08g30740.1|11978.m07074|protein ABC transporter family protein, putative, expressed
ABC transporter	2.59995	2.69248	22.389	2.47043	2.94456	7.59636	5234	LOC_Os01g42410.1|11971.m10506|protein PDR5-like ABC transporter, putative, expressed
ABC transporter	4.52608	2.63544	94.4149	2.41367	2.1475	5.43856	20037	LOC_Os01g42410.1|11971.m10506|protein PDR5-like ABC transporter, putative, expressed
UDP-glycosyltransferase family	28.3529	15.6379	996.797	32.995	113.59	257.531	30874	LOC_Os07g05800.1|11977.m05044|protein Lactoylglutathione lyase, putative, expressed
UDP-glycosyltransferase family	11.5399	5.23491	267.821	25.3661	48.0302	17.2914	15709	LOC_Os05g42040.1|11975.m08378|protein Cytokinin-O-glucosyltransferase 1, putative, expressed
UDP-glycosyltransferase family	12.0605	12.2948	820.578	12.1888	38.7352	81.2574	18000	LOC_Os07g13770.1|11977.m05823|protein UDP-glucoronosyl and UDP-glucosyl transferase family protein, expressed
UDP-glycosyltransferase family	17.9873	8.62942	302.325	18.1353	28.7324	5.33195	9990	LOC_Os05g42020.1|11975.m08376|protein Cytokinin-O-glucosyltransferase 1, putative, expressed
UDP-glycosyltransferase family	4.70172	5.56305	89.5506	5.36448	11.6452	14.8441	2747	LOC_Os10g17489.1|11980.m04834|protein UDP-glucoronosyl and UDP-glucosyl transferase family protein, expressed
UDP-glycosyltransferase family	5.88249	4.86334	81.4123	4.36001	8.68302	6.95588	30894	LOC_Os02g51930.1|11972.m10224|protein Cytokinin-O-glucosyltransferase 2, putative, expressed
UDP-glycosyltransferase family	5.13184	4.0883	73.6496	4.68724	8.09664	8.44648	32533	LOC_Os10g28080.1|11980.m05691|protein Glycosyl hydrolases family 18 protein, expressed
UDP-glycosyltransferase family	3.03994	6.94131	20.389	3.6281	7.06117	6.23564	32578	LOC_Os07g30620.1|11977.m07330|protein UDP-glucoronosyl and UDP-glucosyl transferase family protein, expressed
UDP-glycosyltransferase family	5.01964	4.32485	58.5436	3.78541	5.95208	10.5068	23120	LOC_Os02g36830.1|11972.m08770|protein UDP-glucoronosyl and UDP-glucosyl transferase family protein, expressed
UDP-glycosyltransferase family	8.39818	4.83749	72.1669	4.06571	5.48305	8.16119	1415	LOC_Os02g36830.1|11972.m08770|protein UDP-glucoronosyl and UDP-glucosyl transferase family protein, expressed
UDP-glycosyltransferase family	2.53526	2.28382	8.53155	2.37038	2.41225	2.92143	10622	LOC_Os10g28080.1|11980.m05691|protein Glycosyl hydrolases family 18 protein, expressed
Glutathione S-transferase	19.1562	39.124	797.111	25.406	119.823	452.859	16055	LOC_Os10g38470.1|11980.m06617|protein glutathione S-transferase GSTU6, putative, expressed
Glutathione S-transferase	5.49381	18.992	167.915	15.4428	103.725	32.4535	27629	LOC_Os01g72120.1|11971.m13248|protein Glutathione S-transferase, N-terminal domain containing protein, expressed
Glutathione S-transferase	14.4185	5.16049	184.284	6.73165	44.7492	43.9579	2599	LOC_Os01g27260.1|11971.m09177|protein glutathione S-transferase GSTF1, putative, expressed
Glutathione S-transferase	18.4714	11.5499	200.189	13.8096	27.0576	27.4085	37692	LOC_Os01g27210.1|11971.m09172|protein Glutathione S-transferase IV, putative, expressed
Glutathione S-transferase	5.75766	5.25324	82.7979	4.86879	12.1439	20.2337	30168	LOC_Os10g38740.1|11980.m06642|protein glutathione S-transferase GSTU6, putative, expressed
Glutathione S-transferase	4.03512	8.62646	87.2311	5.27754	9.42697	23.1431	26049	LOC_Os10g38610.1|11980.m06630|protein glutathione S-transferase GSTU6, putative, expressed
Glutathione S-transferase	6.23453	6.02177	90.8712	4.87697	7.46316	9.43268	23937	LOC_Os10g38710.1|11980.m06639|protein glutathione S-transferase GSTU6, putative, expressed
Volatyle phenylpropanoids	9.01958	8.00355	166.822	8.47402	8.48893	37.0427	9374	LOC_Os04g43800.1|11974.m09339|protein Phenylalanine ammonia-lyase, putative, expressed
Volatyle phenylpropanoids	8.06112	6.30606	125.264	4.96594	7.19583	9.82818	20063	LOC_Os04g43800.1|11974.m09339|protein Phenylalanine ammonia-lyase, putative, expressed
Volatyle phenylpropanoids	7.10464	4.97605	84.4632	4.58551	5.55322	11.2809	22340	LOC_Os04g43800.1|11974.m09339|protein Phenylalanine ammonia-lyase, putative, expressed
Volatyle phenylpropanoids	8.37785	6.27965	196.124	4.63541	5.48478	12.6344	36420	LOC_Os04g43800.1|11974.m09339|protein Phenylalanine ammonia-lyase, putative, expressed
Volatyle phenylpropanoids	7.07902	4.63765	37.4428	3.7564	4.44886	15.7125	7215	LOC_Os04g43800.1|11974.m09339|protein Phenylalanine ammonia-lyase, putative, expressed
Volatyle phenylpropanoids	6.56654	4.4928	60.7345	4.80906	4.09026	11.1572	34555	LOC_Os04g43800.1|11974.m09339|protein Phenylalanine ammonia-lyase, putative, expressed
Volatyle phenylpropanoids	7.64616	5.86734	73.3959	3.0468	2.98312	7.30972	22990	LOC_Os04g43800.1|11974.m09339|protein Phenylalanine ammonia-lyase, putative, expressed
Volatyle phenylpropanoids	4.26301	3.19731	27.4409	3.14671	2.95391	6.2694	35566	LOC_Os04g43800.1|11974.m09339|protein Phenylalanine ammonia-lyase, putative, expressed
Volatyle phenylpropanoids	8.96141	5.28969	139.035	3.4217	2.49494	2.48715	5888	LOC_Os04g43800.1|11974.m09339|protein Phenylalanine ammonia-lyase, putative, expressed
Miscellaneous defense related genes
	3.69571	3.16783	20.7659	3.73797	4.83505	6.31631	9444	LOC_Os02g52210.1|11972.m10252|protein Zinc finger, C3HC4 type family protein, expressed
	2.68079	3.72085	29.8537	3.39207	4.35784	8.48003	8741	LOC_Os04g52614.3|11974.m35596|protein Protein kinase domain containing protein, expressed
	3.45355	2.60689	25.4447	2.49777	2.52446	4.4514	15751	LOC_Os04g52840.1|11974.m10177|protein Protein kinase domain containing protein, expressed
Transcription and signalling
	9.69372	4.79655	221.036	4.26961	4.8503	6.64788	5644	LOC_Os02g41510.1|11972.m09187|protein Myb-related protein Myb4, putative, expressed
LRR proteins	4.14701	3.40098	46.8354	2.96119	3.85598	6.35896	8481	LOC_Os05g44770.1|11975.m08602|protein Leucine Rich Repeat family protein, expressed
LRR proteins
Uncategorised
	5.31377	5.71253	145.67	5.79998	12.727	18.505	23622	LOC_Os01g04409.1|11971.m07075|protein protein kinase family protein, putative, expressed
	3.08253	5.1828	50.5521	3.50023	5.61355	7.26397	13090	LOC_Os01g09100.1|11971.m07534|protein WRKY DNA binding domain containing protein, expressed
	2.70234	2.94205	27.5213	3.00589	3.81838	5.0971	14763	LOC_Os01g25360.1|11971.m09000|protein hydrolase, alpha/beta fold family protein
	6.32475	7.42544	67.4458	15.9349	41.2211	17.7875	20084	LOC_Os01g28500.1|11971.m09291|protein Pathogenesis-related protein PRMS precursor, putative, expressed
	6.7698	7.85309	50.5324	15.3888	36.8426	26.0061	5965	LOC_Os01g28500.1|11971.m09291|protein Pathogenesis-related protein PRMS precursor, putative, expressed
	7.57959	7.43265	121.715	7.0996	14.8813	4.82501	34965	LOC_Os01g48620.1|11971.m11052|protein expressed protein
	5.74035	4.9275	122.368	4.5349	8.99187	12.9371	36102	LOC_Os01g53920.1|11971.m11556|protein Leucine Rich Repeat family protein, expressed
	2.57372	4.51937	7.17085	3.16941	3.90147	8.27027	17908	LOC_Os01g63690.1|11971.m12484|protein Nematode-resistance protein, putative, expressed
	4.05879	2.60555	18.0789	3.21378	2.49526	2.23893	22997	LOC_Os01g64470.1|11971.m12561|protein Harpin-induced protein 1 containing protein, expressed
	10.568	3.26759	49.0499	7.30743	11.9526	8.30907	34552	LOC_Os01g70490.1|11971.m13096|protein Potassium transporter 5, putative, expressed
	14.6572	4.02555	319.667	6.25984	9.19622	4.28946	178	LOC_Os01g70490.1|11971.m13096|protein Potassium transporter 5, putative, expressed
	4.08897	2.77588	37.9393	2.58994	3.67383	4.27985	8299	LOC_Os01g72240.1|11971.m13259|protein Uridine 5&apos;-monophosphate synthase, putative, expressed
	2.65348	3.76796	9.12737	2.21032	2.70019	3.76383	25611	LOC_Os02g06930.1|11972.m33568|protein Protein kinase domain containing protein, expressed
	3.6396	3.24849	18.8571	3.07367	4.13418	8.61494	28187	LOC_Os02g07750.1|11972.m06121|protein LEM3 family/CDC50 family protein, expressed
	4.54846	3.56056	35.1329	3.79936	3.77582	6.66803	3251	LOC_Os02g09960.1|11972.m06293|protein Protein kinase domain containing protein, expressed
	3.33667	2.05536	13.9994	2.6089	2.36729	6.25539	9147	LOC_Os02g32520.1|11972.m08345|protein ERD1 protein, chloroplast precursor, putative, expressed
	3.81507	2.1749	17.0122	2.67092	2.01161	3.12348	34746	LOC_Os02g32520.2|11972.m33701|protein ERD1 protein, chloroplast precursor, putative, expressed
	7.15875	8.14145	352.537	9.50676	26.4165	27.1727	2575	LOC_Os02g33110.2|11972.m77817|protein Beta-fructofuranosidase, insoluble isoenzyme 1 precursor, putative, expressed
	6.90384	6.45589	197.746	6.67648	13.9517	51.969	18628	LOC_Os02g36530.1|11972.m08740|protein expressed protein
	4.96436	4.09021	39.0093	3.3881	4.72447	4.7709	33532	LOC_Os02g42810.1|11972.m09316|protein oxidoreductase, short chain dehydrogenase/reductase family protein, expressed
	3.56787	3.50018	24.3028	3.92465	3.27474	6.66917	17545	LOC_Os02g42810.1|11972.m09316|protein oxidoreductase, short chain dehydrogenase/reductase family protein, expressed
	5.06507	3.87323	42.2926	2.52472	3.19942	8.16813	25391	LOC_Os02g44000.1|11972.m09435|protein Acetylglutamate kinase, putative, expressed
	5.30171	5.92955	90.6455	6.3044	12.7648	2.97334	37473	LOC_Os02g50710.1|11972.m10105|protein expressed protein
	5.36425	4.62926	80.3256	5.82648	8.67197	16.7867	8400	LOC_Os02g50710.1|11972.m10105|protein expressed protein
	12.1048	12.3703	153.01	13.6198	35.9463	41.1553	897	LOC_Os03g08720.1|11973.m06379|protein Transferase family protein, expressed
	4.17673	2.34805	17.1692	3.13269	2.23145	2.47634	31372	LOC_Os03g09140.2|11973.m35057|protein Ras-related protein Rab-6A, putative, expressed
	4.19049	3.24976	28.7005	3.72161	3.82831	7.17462	17194	LOC_Os03g09900.1|11973.m06444|protein membrane protein, putative, expressed
	6.15431	8.68356	112.545	9.19773	29.7404	28.7259	24417	LOC_Os03g11900.1|11973.m06642|protein Sugar carrier protein C, putative, expressed
	2.38602	4.58231	8.33256	4.04982	8.27495	12.6529	15666	LOC_Os03g12890.5|11973.m35111|protein Branched-chain-amino-acid aminotransferase 5, chloroplast precursor, putative, expressed
	3.98789	3.53056	23.8233	5.07627	5.4176	9.74197	3115	LOC_Os03g15780.5|11973.m34825|protein anthranilate synthase component I family protein, expressed
	2.09068	2.85478	12.2165	2.5052	3.23686	4.01987	3305	LOC_Os03g16390.1|11973.m07074|protein expressed protein
	2.24915	2.67749	11.7667	2.15407	2.64582	2.92596	16560	LOC_Os03g17700.1|11973.m07195|protein Mitogen-activated protein kinase homolog 6, putative, expressed
	4.21639	4.22446	19.4575	3.35109	2.26744	4.03523	34844	LOC_Os03g18560.1|11973.m07278|protein expressed protein
	33.7778	3.45867	148.009	43.7159	55.3804	9.61286	23486	LOC_Os03g29170.2|11973.m35269|protein NAD dependent epimerase/dehydratase family protein, expressed
	4.76054	9.11429	87.7703	10.3109	18.3469	20.2733	1994	LOC_Os03g42810.1|11973.m35319|protein Type I inositol-1,4,5-trisphosphate 5-phosphatase 11, putative, expressed
	3.23905	3.30164	49.3675	3.92833	6.84291	4.6122	21206	LOC_Os03g45960.1|11973.m09617|protein P21 protein, putative, expressed
	2.16299	2.52075	4.72575	3.28927	2.46131	2.27222	30618	LOC_Os03g49440.1|11973.m09943|protein Phosphatase, putative, expressed
	2.95414	2.33373	10.9057	3.52908	15.328	9.00538	5648	LOC_Os03g51350.1|11973.m10116|protein expressed protein
	9.77304	10.0872	204.741	17.9723	38.3771	7.44477	22583	LOC_Os03g52370.1|11973.m10214|protein expressed protein
	5.57455	5.77917	27.5222	7.75773	12.3784	6.40209	8508	LOC_Os03g52380.1|11973.m10215|protein expressed protein
	4.35063	3.14939	22.8696	4.59749	3.08956	3.5729	28393	LOC_Os03g58900.1|11973.m10793|protein galactosyltransferase family protein, putative, expressed
	4.56306	3.50701	61.4107	6.408	10.6462	7.29513	130	LOC_Os03g62200.1|11973.m11098|protein Ammonium transporter 2, putative, expressed
	11.3006	6.21948	334.861	9.60619	20.576	59.2848	33041	LOC_Os04g12720.1|11974.m06515|protein Indole-3-acetate beta-glucosyltransferase, putative, expressed
	9.24167	6.21772	150.533	10.199	26.9198	16.309	30248	LOC_Os04g37490.1|11974.m08738|protein NADH-dependent oxidoreductase 2, putative, expressed
	12.463	71.4089	828.659	413.524	531.69	850.926	24794	LOC_Os04g39700.1|11974.m08956|protein 60S ribosomal protein L6, putative, expressed
	5.22531	6.14944	42.8801	10.5233	9.38112	18.1495	12971	LOC_Os04g40410.1|11974.m09024|protein NAR2.2, putative, expressed
	2.26452	2.09401	7.18991	2.51276	2.45822	3.03638	2097	LOC_Os04g41500.2|11974.m35163|protein expressed protein
	2.67444	2.71965	22.7823	2.96338	4.01713	5.51884	12764	LOC_Os04g43070.1|11974.m09271|protein Ammonium transporter 1, member 2, putative, expressed
	9.16652	7.22772	324.732	8.61695	11.2367	48.7235	21614	LOC_Os04g51150.1|11974.m10011|protein transposon protein, putative, unclassified, expressed
	9.43208	6.31184	538.707	12.112	13.9607	14.0501	18877	LOC_Os04g56910.1|11974.m10578|protein Transferase family protein, expressed
	4.1759	3.52631	24.888	4.27832	6.54992	11.294	36648	LOC_Os05g04700.1|11975.m05001|protein Uncharacterized protein family protein, expressed
	2.80498	3.47704	23.794	2.37489	4.41895	7.04057	35765	LOC_Os05g04700.1|11975.m05001|protein Uncharacterized protein family protein, expressed
	4.54561	4.84837	21.3956	5.71775	8.22378	6.98342	5811	LOC_Os05g05270.1|11975.m27698|protein sucrose-phosphatase, putative, expressed
	8.42892	5.22511	42.501	5.24704	5.42306	3.22084	17282	LOC_Os05g05270.1|11975.m27698|protein sucrose-phosphatase, putative, expressed
	2.75228	4.27191	17.3623	2.94927	4.86439	8.28845	4803	LOC_Os05g09500.1|11975.m27731|protein Hexokinase 1, putative, expressed
	23.4978	25.2874	307.116	28.6034	43.3327	15.2317	28005	LOC_Os05g23720.1|11975.m06665|protein ADP,ATP carrier protein, mitochondrial precursor, putative, expressed
	2.05115	2.45803	7.60476	2.92134	2.8257	4.06548	32297	LOC_Os05g24650.1|11975.m06759|protein expressed protein
	2.91379	2.1867	11.6838	2.26611	2.67772	3.30333	9281	LOC_Os05g46260.1|11975.m08751|protein expressed protein
	22.9309	14.7363	227.91	84.4741	207.822	57.4363	23138	LOC_Os06g04510.1|11976.m05181|protein Enolase 1, putative, expressed
	14.3175	5.88796	76.4564	14.86	13.068	6.68532	30568	LOC_Os06g04900.1|11976.m05219|protein Hexose carrier protein HEX6, putative
	2.33432	3.03802	8.71936	2.30556	4.04664	4.84731	6439	LOC_Os06g12250.1|11976.m05942|protein Protein SUR2, putative, expressed
	8.30653	8.45314	125.692	8.73932	12.9257	24.8905	13722	LOC_Os06g35650.1|11976.m08102|protein Reticuline oxidase precursor, putative, expressed
	17.0046	19.0541	593.881	25.166	96.0189	51.0345	14648	LOC_Os06g35700.1|11976.m08107|protein Reticuline oxidase precursor, putative, expressed
	4.22152	5.44313	43.4888	4.06549	4.97745	11.8197	4752	LOC_Os06g41960.1|11976.m08728|protein Protein kinase domain containing protein
	2.58138	2.46354	11.3155	2.28285	3.03656	2.9751	31165	LOC_Os06g47790.1|11976.m09305|protein Protein kinase domain containing protein, expressed
	4.62163	5.58081	23.991	5.56881	9.78627	12.3696	19622	LOC_Os07g01560.2|11977.m28944|protein Glucose transporter, putative, expressed
	23.2385	17.3692	200.84	40.3396	77.9915	42.133	6667	LOC_Os07g02850.1|11977.m04756|protein expressed protein
	24.1299	16.5144	166.315	17.7845	60.7379	28.0556	6360	LOC_Os07g02850.1|11977.m04756|protein expressed protein
	29.5167	12.6156	95.1736	32.4604	67.429	30.3445	8561	LOC_Os07g02880.1|11977.m04759|protein expressed protein
	4.65	3.27838	62.253	2.95929	3.53149	10.2153	13568	LOC_Os07g06850.1|11977.m05145|protein PrMC3, putative, expressed
	4.5372	6.66647	29.3386	9.32033	11.4917	6.73338	7712	LOC_Os07g26110.1|11977.m06888|protein plant integral membrane protein TIGR01569 containing protein, expressed
	3.35761	2.69645	52.7503	4.15911	8.18671	12.5833	30972	LOC_Os07g39350.1|11977.m08177|protein Sugar transporter family protein, expressed
	7.63278	4.27961	81.6452	5.03737	5.24198	10.0749	10477	LOC_Os07g39740.1|11977.m08216|protein Esterase precursor, putative, expressed
	4.09871	2.79513	18.7577	3.87096	3.96444	4.86972	6751	LOC_Os07g39740.1|11977.m08216|protein Esterase precursor, putative, expressed
	6.74448	3.49081	54.4559	6.16627	9.37695	20.0339	37208	LOC_Os07g41460.1|11977.m08382|protein Sulfotransferase domain containing protein, expressed
	6.52808	5.57927	78.8412	4.29906	5.98959	8.68281	8119	LOC_Os07g42740.1|11977.m08504|protein expressed protein
	5.11864	3.38696	41.6466	5.5484	7.56522	10.8979	34386	LOC_Os08g03350.1|11978.m04478|protein lysine and histidine specific transporter, putative, expressed
	4.88668	2.78547	38.7813	5.26965	5.98587	6.37169	15046	LOC_Os08g03350.1|11978.m04478|protein lysine and histidine specific transporter, putative, expressed
	6.1854	4.53303	63.3044	4.33725	4.2705	6.48456	17359	LOC_Os08g04180.1|11978.m04562|protein Tryptophan synthase beta chain 2, chloroplast precursor, putative, expressed
	23.5247	20.3618	2186.72	29.5722	58.6045	186.63	9903	LOC_Os08g04340.1|11978.m04578|protein Plastocyanin-like domain containing protein, expressed
	11.0449	8.79104	205.56	14.8359	16.745	36.2212	22647	LOC_Os08g04350.1|11978.m04579|protein Plastocyanin-like domain containing protein, expressed
	27.2843	13.5767	415.176	19.0374	34.5337	4.02874	1731	LOC_Os08g06100.1|11978.m04749|protein Caffeic acid 3-O-methyltransferase, putative, expressed
	12.3156	5.53502	213.468	35.9649	11.7952	28.7813	3863	LOC_Os08g08990.1|11978.m05034|protein Germin-like protein subfamily 1 member 11 precursor, putative, expressed
	8.99264	7.10116	85.8501	24.342	38.2795	34.0325	8321	LOC_Os08g09010.1|11978.m05036|protein Germin-like protein subfamily 1 member 11 precursor, putative, expressed
	20.7974	10.6269	218.283	33.7743	86.3258	46.2176	16396	LOC_Os08g09080.1|11978.m05043|protein Germin-like protein subfamily 1 member 11 precursor, putative, expressed
	4.10235	3.00044	30.9543	2.44367	2.81416	2.22661	22516	LOC_Os08g10070.2|11978.m26611|protein Protein kinase domain containing protein, expressed
	2.6044	2.54919	8.48047	2.86287	3.01746	6.25704	8543	LOC_Os08g30820.1|11978.m07082|protein pre-mrna cleavage factor, putative, expressed
	9.49154	5.21667	87.7085	5.55954	7.40377	10.7411	12271	LOC_Os08g34790.1|11978.m07468|protein 4-coumarate-CoA ligase 2, putative, expressed
	2.09577	3.24454	8.75239	3.00043	3.93356	6.03277	1409	LOC_Os08g37500.1|11978.m07736|protein expressed protein
	3.59043	3.88022	26.3295	4.03585	7.27877	8.95528	9893	LOC_Os08g37874.1|11978.m62018|protein 2-nitropropane dioxygenase family, putative, expressed
	4.84183	4.41439	55.7298	3.96605	5.977	5.36576	4448	LOC_Os08g37874.1|11978.m62018|protein 2-nitropropane dioxygenase family, putative, expressed
	5.28451	3.68761	51.9599	3.60105	5.51325	6.08182	19825	LOC_Os08g37874.3|11978.m61970|protein 2-nitropropane dioxygenase family, putative, expressed
	3.27061	3.12741	15.7888	2.88573	4.2259	4.47362	32989	LOC_Os08g38960.1|11978.m07879|protein expressed protein
	13.325	17.184	698.956	40.7791	132.304	111.43	28618	LOC_Os09g08130.2|11979.m04082|protein Indole-3-glycerol phosphate synthase, chloroplast precursor, putative, expressed
	4.77399	3.90679	35.2001	5.29216	7.56249	14.3646	24959	LOC_Os09g19970.1|11979.m05204|protein expressed protein
	2.93458	2.19687	7.93427	2.45854	2.55386	2.26101	2467	LOC_Os09g29210.1|11979.m06072|protein purine permease, putative, expressed
	27.4852	4.56455	1687.93	22.9317	24.9448	87.7797	26337	LOC_Os09g34020.1|11979.m06451|protein expressed protein
	24.5059	16.5418	1992.66	17.0122	38.8643	59.7765	16442	LOC_Os09g37120.1|11979.m06660|protein Ornithine decarboxylase, putative, expressed
	23.6356	16.7906	1622.46	19.8397	46.926	120.44	24760	LOC_Os09g37180.1|11979.m06666|protein Transferase family protein, expressed
	8.13822	4.52237	307.071	8.51767	9.88946	36.2029	29593	LOC_Os09g39940.1|11979.m06931|protein Plastocyanin-like domain containing protein, expressed
	10.5873	4.66797	458.988	9.01868	9.66729	19.1155	27503	LOC_Os09g39940.1|11979.m06931|protein Plastocyanin-like domain containing protein, expressed
	9.21278	7.53216	359.798	9.6056	8.81804	24.5115	22494	LOC_Os09g39940.1|11979.m06931|protein Plastocyanin-like domain containing protein, expressed
	2.17567	3.60458	4.61373	3.37262	3.65898	5.49124	31233	LOC_Os10g04540.1|11980.m03866|protein hypothetical protein
	8.8574	5.77459	113.867	13.5174	26.7254	13.8759	31802	LOC_Os10g11500.1|11980.m04472|protein Pathogenesis-related protein PRB1-2 precursor, putative, expressed
	4.98061	3.20405	27.3012	9.22715	9.71029	5.9571	6951	LOC_Os10g34760.1|11980.m06303|protein Ripening-related protein, putative
	4.11496	2.59652	6.27715	6.01977	5.51005	3.56039	27665	LOC_Os10g34920.1|11980.m06316|protein secretory protein, putative, expressed
	4.04165	2.40466	21.5692	3.25203	3.694	5.94223	2868	LOC_Os10g34920.1|11980.m06316|protein secretory protein, putative, expressed
	5.69662	2.61812	22.1944	4.89303	3.24938	3.08568	14072	LOC_Os10g34920.1|11980.m06316|protein secretory protein, putative, expressed
	3.17496	2.13829	3.96576	2.95484	2.13109	2.10453	12814	LOC_Os10g34920.1|11980.m06316|protein secretory protein, putative, expressed
	3.61986	2.73925	58.5304	2.43574	5.46803	4.72898	23052	LOC_Os10g34930.1|11980.m06317|protein secretory protein, putative, expressed
	25.7257	9.95302	827.979	25.2801	48.1943	24.7684	35737	LOC_Os10g37880.1|11980.m06574|protein oxidoreductase, 2OG-Fe oxygenase family protein, expressed
	6.7495	4.30206	29.3621	3.575	2.05968	2.21701	20332	LOC_Os10g40640.1|11980.m06834|protein Glycogenin, putative, expressed
	2.12966	2.56438	7.40074	2.81501	3.346	3.43204	37069	LOC_Os10g41020.1|11980.m06867|protein oxidoreductase, 2OG-Fe oxygenase family protein, expressed
	3.78587	2.58608	14.664	2.7591	3.41065	5.90899	21398	LOC_Os11g15570.1|11981.m05691|protein expressed protein
	2.68671	2.80023	3.11235	9.84267	6.58496	7.22751	8707	LOC_Os11g26760.1|11981.m06595|protein Dehydrin family protein, expressed
	2.59956	2.58484	8.82578	8.09978	6.36024	8.4769	34074	LOC_Os11g26760.1|11981.m06595|protein Dehydrin family protein, expressed
	2.24749	2.76821	6.16437	2.43507	2.54091	2.69511	20966	LOC_Os11g31960.1|11981.m07098|protein expressed protein
	5.44637	4.20881	41.06	8.64294	33.2364	13.219	33392	LOC_Os11g37950.1|11981.m07642|protein Barwin, putative, expressed
	7.95465	13.4382	136.003	12.3763	44.9729	19.1638	29278	LOC_Os12g12590.1|11982.m05232|protein NADP-dependent oxidoreductase P1, putative, expressed
	6.62222	31.7206	259.297	36.1073	151.717	37.2659	14692	LOC_Os12g25090.2|11982.m56494|protein expressed protein
	2.13837	2.4561	9.233	4.77768	5.15906	5.11481	4398	LOC_Os12g25090.2|11982.m56494|protein expressed protein
	2.76058	3.82999	22.1162	3.16656	4.47728	12.7128	26056	LOC_Os12g29400.1|11982.m06754|protein ABA-responsive protein, putative, expressed
	4.12278	3.77811	44.3564	2.52602	3.64159	5.16854	3980	LOC_Os12g32190.1|11982.m07025|protein expressed protein
	5.83807	13.5451	171.955	8.31853	42.9587	50.3253	19889	LOC_Os12g42200.1|11982.m07999|protein cation/hydrogen exchanger, putative, expressed
Unknown
	22.9649	11.7764	3517.04	23.0181	119.252	356.681	1153	_
	7.12267	9.16803	107.545	9.29589	35.5515	136.684	2552	_
	6.00326	10.1898	84.7288	12.6787	31.9473	49.1842	21727	_
	15.2217	4.54734	220.593	20.287	30.0944	8.37344	2361	_
	14.5908	10.0833	757.35	15.9993	29.8263	81.9603	19111	_
	6.12412	9.11346	85.4612	12.7262	29.2835	50.5748	15279	_
	8.99243	19.8855	389.067	24.269	22.3607	53.7638	32426	_
	4.62114	21.7251	24.9801	9.62831	20.0846	26.2934	19973	_
	6.9181	3.55341	104.48	12.288	11.5028	8.37638	11112	_
	7.0057	6.5412	108.417	5.17472	11.2949	13.7815	26181	_
	10.8938	5.00865	224.546	10.172	11.0704	13.134	11561	_
	5.19263	7.83088	106.117	6.64462	11.0298	25.3265	29885	_
	5.47633	5.91585	58.1533	9.03852	10.5162	31.1457	32347	_
	7.61261	4.52437	232.104	8.64643	10.3224	22.1378	11756	_
	16.4872	2.06249	1140.16	10.0087	10.1064	37.9708	12994	_
	7.71858	3.53657	29.6245	7.39085	8.73089	4.79702	20749	_
	6.95506	5.83267	55.1342	5.2357	7.65496	6.21117	7416	_
	4.19852	5.74493	28.2399	8.41198	6.69248	6.65382	14567	_
	5.22735	3.88468	47.9574	8.16557	6.35236	4.68023	521	_
	5.37183	3.90683	103.596	6.68907	6.16717	2.8396	34108	_
	5.13626	3.49828	25.5373	5.68969	6.06439	10.2787	34399	_
	2.01551	6.82746	16.1456	5.30742	5.51625	3.52798	16177	_
	2.90228	3.72938	17.5779	3.32308	5.33643	19.3111	5195	_
	4.84363	3.99109	56.2683	6.3276	5.03663	3.43031	12125	_
	4.20242	4.14831	72.3403	3.61351	4.63141	11.2587	8057	_
	4.78806	3.27805	71.4829	3.80475	4.32482	11.6834	30097	_
	4.32432	3.2865	54.6661	3.71524	4.22033	13.8571	19333	_
	4.08775	3.20461	23.108	3.42809	3.89925	3.69278	6954	_
	2.67498	2.58599	8.23611	2.51105	3.8299	6.09601	29672	_
	7.43005	2.30942	238.005	2.90622	3.82096	8.41662	9584	_
	2.53725	2.72421	19.2021	2.92818	3.64837	4.18956	15985	_
	4.89599	3.68475	34.8347	2.87534	3.61268	6.58572	4510	_
	3.4526	2.65006	27.455	3.1366	3.4923	3.40803	20028	_
	2.94897	2.44009	12.7278	2.96634	3.30826	4.61298	36033	_
	4.05198	2.72098	6.18708	3.16995	3.27103	4.04269	14958	_
	3.14655	3.31227	39.1177	3.10365	3.03985	7.63039	13492	_
	2.91947	2.50837	12.9959	2.57426	2.94073	4.03674	6523	_
	2.29955	2.02679	4.78369	2.02457	2.25172	2.80004	10047	_
	2.00522	2.85491	5.06883	2.12228	2.14188	2.65469	1666	_

## Sheet: Table S3
Table S3. Classification of genotype-specific differentially expressed genes according to the functional classes.
Group	Gamenya 3 dai up-regulated differenctial expressed genes
	Gene classes	Fold Change	Probe ID	Annotation
I	Miscellaneous defense related genes
		2.02436	1665	LOC_Os07g49470.1|11977.m09155|protein Serine/threonine-protein kinase RLCKVII, putative, expressed
II	Cysteine-rich Antimicrobial peptides (AMPs)
	Protease inhibitor	10.4077	27963	LOC_Os04g44470.1|11974.m09406|protein Alpha-amylase/subtilisin inhibitor, putative, expressed
	Non-specific lipid-transfer protein	57.6863	2380	LOC_Os06g31070.1|11976.m07649|protein Protease inhibitor/seed storage/LTP family protein, expressed
	Non-specific lipid-transfer protein	41.9437	11751	LOC_Os06g31070.1|11976.m07649|protein Protease inhibitor/seed storage/LTP family protein, expressed
	Thionin	189.225	23363	LOC_Os06g32550.1|11976.m07793|protein Plant thionin family protein
	Thionin	154.669	14475	LOC_Os06g32550.1|11976.m07793|protein Plant thionin family protein
	Thionin	95.2652	2756	LOC_Os06g32550.1|11976.m07793|protein Plant thionin family protein
Group	Gamenya 7 dai up-regulated differenctial expressed genes
	Gene classes	Fold Change	Probe ID	Annotation
I	JA and ET related genes
	Lipid metabolism	2.67207	14806	LOC_Os08g37250.1|11978.m07711|protein Patatin-like phospholipase family protein, expressed
II	Cysteine-rich Antimicrobial peptides (AMPs)
	Thaumatin	5.12051	18177	LOC_Os12g43440.1|11982.m08117|protein Thaumatin-like protein precursor, putative, expressed
	Proteolysis
		2.37541	26783	LOC_Os11g08100.1|11981.m05006|protein Eukaryotic aspartyl protease family protein, expressed
	Peroxidase
		9.10247	3455	LOC_Os07g48010.1|11977.m09016|protein Peroxidase 2 precursor, putative, expressed
		3.7512	32219	LOC_Os07g47990.1|11977.m09014|protein Peroxidase 2 precursor, putative, expressed
		2.72349	3083	LOC_Os07g48050.1|11977.m09020|protein Peroxidase 2 precursor, putative, expressed
	Genes related to cell wall defense
	Degradation of fungal cell wall	9.22036	28540	LOC_Os01g71350.1|11971.m13178|protein Glucan endo-1,3-beta-glucosidase GII precursor, putative, expressed
III	Secondary metabolism and detoxification
	Glutathione S-transferases	2.54997	18255	LOC_Os02g21460.1|11972.m07386|protein glutathione S-transferase, putative, expressed
Group	Sumai 3 3 dai Differenctial expressed genes
	Gene classes	Fold Change	Probe ID	Annotation
I	JA and ET related genes
	Jasmonic acid	3.18953	25295	LOC_Os06g11240.1|11976.m05841|protein 12-oxophytodienoate reductase 2, putative, expressed
	Jasmonic acid	3.19066	31310	LOC_Os07g36830.1|11977.m07933|protein F-box domain containing protein
	Lipid metabolic process	2.49013	10676	LOC_Os01g19240.1|11971.m08461|protein Integral membrane protein DUF6 containing protein
	Hormone
	Auxine	2.34543	25067	LOC_Os06g48950.1|11976.m09421|protein Auxin response factor family protein
	Gibbellerin	3.77246	20017	LOC_Os03g55290.1|11973.m10444|protein Gibberellin-regulated protein 2 precursor, putative, expressed
	Abscisic acid	2.57531	1378	LOC_Os02g50140.1|11972.m10048|protein ABA-induced protein, putative
	Abscisic acid	2.34895	8536	LOC_Os01g64000.1|11971.m12515|protein ABA response element binding factor, putative, expressed
	GDSL-lipases
		2.29041	12415	LOC_Os05g44200.1|11975.m08546|protein GDSL-like Lipase/Acylhydrolase family protein, expressed
		2.43819	27606	LOC_Os02g15230.1|11972.m77786|protein GDSL-like Lipase/Acylhydrolase family protein, expressed
		2.26857	495	LOC_Os01g52770.1|11971.m11450|protein GDSL-like Lipase/Acylhydrolase family protein, expressed
		12.3716	28107	LOC_Os01g46210.1|11971.m10819|protein GDSL-like Lipase/Acylhydrolase family protein
II	Cysteine-rich Antimicrobial peptides (AMPs)
	Thionin	12.5893	30746	LOC_Os04g11130.1|11974.m06360|protein Gamma-thionins family protein, expressed
	Thionin	6.79756	18008	LOC_Os04g11130.1|11974.m06360|protein Gamma-thionins family protein, expressed
	Thionin	3.56329	14550	LOC_Os04g11130.1|11974.m06360|protein Gamma-thionins family protein, expressed
	Thionin	2.29783	26440	LOC_Os03g60840.1|11973.m10972|protein Bowman-Birk serine protease inhibitor family protein, expressed
	Thionin	2.28645	12683	LOC_Os03g03810.1|11973.m05913|protein Gamma-thionin homolog PPT precursor, putative, expressed
	Thionin	2.11476	30628	LOC_Os03g03810.1|11973.m05913|protein Gamma-thionin homolog PPT precursor, putative, expressed
	Proteolysis
		3.38282	6901	LOC_Os11g08200.1|11981.m05016|protein Aspartic proteinase Asp1 precursor, putative, expressed
		2.84356	15627	LOC_Os12g07780.2|11982.m04765|protein Eukaryotic aspartyl protease family protein, expressed
		5.90862	19839	LOC_Os09g28830.1|11979.m06034|protein Serine carboxypeptidase family protein
		16.8291	33929	LOC_Os07g48650.1|11977.m09076|protein Subtilisin N-terminal Region family protein, expressed
		2.85629	8022	LOC_Os07g24050.1|11977.m06683|protein carboxyl-terminal proteinase, putative
		2.91475	28676	LOC_Os05g27500.1|11975.m07038|protein carboxyl-terminal peptidase, putative
		2.16969	21876	LOC_Os04g58560.2|11974.m79009|protein Peptidase family C54 containing protein, expressed
		2.3291	27919	LOC_Os03g31630.1|11973.m08413|protein Subtilase family protein
		11.4569	32416	LOC_Os02g17090.1|11972.m06952|protein Subtilisin N-terminal Region family protein, expressed
		2.0565	19403	LOC_Os01g24600.1|11971.m08927|protein Papain family cysteine protease containing protein, expressed
	Peroxidases
		3.17885	25890	LOC_Os07g48050.1|11977.m09020|protein Peroxidase 2 precursor, putative, expressed
		2.44643	25882	LOC_Os01g15830.1|11971.m08181|protein Peroxidase 72 precursor, putative, expressed
	Genes related to cell wall defense
	Inactivation of fungal polygalacturonase
		2.11391	36826	LOC_Os03g03350.1|11973.m05870|protein polygalacturonase, putative, expressed
		2.00394	25154	LOC_Os01g07790.1|11971.m07406|protein Polygalacturonase family protein, expressed
	Inhibitor of fungal glycanases
		2.27799	12283	LOC_Os10g21110.1|11980.m05130|protein 1,4-beta-xylanase, putative, expressed
		3.65529	28231	LOC_Os04g49730.1|11974.m09906|protein pectinesterase inhibitor domain containing protein
		6.66659	32935	LOC_Os02g46290.1|11972.m09666|protein pectinesterase inhibitor domain containing protein, expressed
		2.65241	33761	LOC_Os02g33130.1|11972.m08406|protein pectinesterase inhibitor domain containing protein, expressed
		3.18871	5190	LOC_Os01g21630.1|11971.m08647|protein Pectinesterase, putative, expressed
		3.81461	2099	LOC_Os01g02070.1|11971.m06849|protein pectinesterase inhibitor domain containing protein
		3.69424	16372	LOC_Os01g02070.1|11971.m06849|protein pectinesterase inhibitor domain containing protein
		2.06185	19409	LOC_Os01g02070.1|11971.m06849|protein pectinesterase inhibitor domain containing protein
	Degradation of fungal cell wall
		4.97361	25695	LOC_Os05g33140.1|11975.m07546|protein Basic endochitinase 1 precursor, putative, expressed
III	Secondary metabolism and detoxification
	UDP-glucoronosyl and UDP-glucosyl transferase family	3.72868	264	LOC_Os11g25730.1|11981.m06494|protein UDP-glucoronosyl and UDP-glucosyl transferase family protein, expressed
	UDP-glucoronosyl and UDP-glucosyl transferase family	2.75905	5148	LOC_Os07g43710.1|11977.m08596|protein glycosyltransferase 5, putative, expressed
	UDP-glucoronosyl and UDP-glucosyl transferase family	3.14933	19010	LOC_Os03g14010.3|11973.m34818|protein Glycosyl hydrolase family 10 protein, expressed
	ABC transporter	4.15222	7284	LOC_Os11g37700.1|11981.m07615|protein ABC transporter, putative, expressed
	ABC transporter	2.22422	632	LOC_Os08g29570.1|11978.m06961|protein PDR-type ABC transporter 1, putative, expressed
	Cytochrome P450s	6.8079	8555	LOC_Os02g09290.1|11972.m06226|protein Cytochrome P450 71D10, putative, expressed
	MRP	8.3051	7020	LOC_Os01g50160.1|11971.m11200|protein multidrug resistance protein 1 homolog, putative, expressed
	Volatile phenylpropanoids	2.17206	24118	LOC_Os02g41650.2|11972.m33782|protein Phenylalanine ammonia-lyase, putative, expressed
	Flavonoids	2.2818	7692	LOC_Os11g32650.1|11981.m07166|protein Chalcone synthase, putative, expressed
		2.13046	29125	LOC_Os11g32650.1|11981.m07166|protein Chalcone synthase, putative, expressed
Group	Sumai 3 7 dai Differenctial expressed defense-related genes
	Gene classes	Fold Change	Probe ID	Annotation
I	JA and ET related genes
	Fatty acid metabolism & derivatives/Lipid metabolism	2.62707	16083	LOC_Os05g49900.1|11975.m09060|protein Fatty acid elongase, putative, expressed
		2.00887	8506	LOC_Os03g43880.1|11973.m09429|protein Patatin-like phospholipase family protein, expressed
		2.37391	6824	LOC_Os02g48350.1|11972.m09869|protein Diacylglycerol acyltransferase family protein, expressed
		2.17858	8259	LOC_Os01g46240.1|11971.m10822|protein lipase class 3 family protein, putative, expressed
	Ethylen biosynthesis	2.24809	31295	LOC_Os12g16650.1|11982.m05623|protein cyclopropane fatty acid synthase, putative, expressed
	Ethylen biosynthesis	2.0804	31128	LOC_Os05g05680.1|11975.m05095|protein 1-aminocyclopropane-1-carboxylate oxidase, putative, expressed
	Miscellaneous defense related genes
		16.4529	4055	LOC_Os11g14900.3|11981.m28772|protein Thiol protease SEN102 precursor, putative, expressed
		2.1835	15605	LOC_Os11g11780.1|11981.m05370|protein serine/threonine protein kinase, putative, expressed
		2.14162	15735	LOC_Os05g01270.1|11975.m04668|protein peptidyl-prolyl cis-trans isomerase, cyclophilin-type family protein, expressed
		2.16215	804	LOC_Os03g21620.1|11973.m07566|protein Serine/threonine-protein kinase AtPK19, putative, expressed
		2.0808	2829	LOC_Os03g21620.1|11973.m07566|protein Serine/threonine-protein kinase AtPK19, putative, expressed
	GDSL-lpases
		3.07784	3521	LOC_Os10g33690.1|11980.m06197|protein GDSL-like Lipase/Acylhydrolase family protein, expressed
		3.42479	23861	LOC_Os06g05550.1|11976.m05282|protein GDSL-like Lipase/Acylhydrolase family protein, expressed
	Hormone metabolism
	Auxine	2.44569	9564	LOC_Os08g35190.1|11978.m07508|protein Dormancy/auxin associated protein, expressed
	Auxine	2.40448	27592	LOC_Os01g58860.1|11971.m12027|protein Auxin Efflux Carrier family protein, expressed
II	Cysteine-rich Antimicrobial peptides (AMPs)
	Jasmonate-regulated proteins (JRP)	10.5442	22753	LOC_Os11g39420.1|11981.m07789|protein Jacalin-like lectin domain containing protein
	Non-specific lipid transfer protein	6.25702	27539	LOC_Os06g31070.1|11976.m07649|protein Protease inhibitor/seed storage/LTP family protein, expressed
	Non-specific lipid transfer protein	3.85502	18237	LOC_Os06g31070.1|11976.m07649|protein Protease inhibitor/seed storage/LTP family protein, expressed
	Non-specific lipid transfer protein	3.66073	16375	LOC_Os06g31070.1|11976.m07649|protein Protease inhibitor/seed storage/LTP family protein, expressed
	Non-specific lipid transfer protein	3.56673	37734	LOC_Os06g31070.1|11976.m07649|protein Protease inhibitor/seed storage/LTP family protein, expressed
	Non-specific lipid transfer protein	2.81525	8345	LOC_Os06g31070.1|11976.m07649|protein Protease inhibitor/seed storage/LTP family protein, expressed
	Non-specific lipid transfer protein	2.70028	17008	LOC_Os06g31070.1|11976.m07649|protein Protease inhibitor/seed storage/LTP family protein, expressed
	Non-specific lipid transfer protein	2.48229	9839	LOC_Os06g31070.1|11976.m07649|protein Protease inhibitor/seed storage/LTP family protein, expressed
	Non-specific lipid transfer protein	3.53582	26101	LOC_Os12g16880.1|11982.m05646|protein Protease inhibitor/seed storage/LTP family protein, expressed
	Non-specific lipid transfer protein	2.35222	14455	LOC_Os06g31070.1|11976.m07649|protein Protease inhibitor/seed storage/LTP family protein, expressed
	Non-specific lipid transfer protein	2.23678	31962	LOC_Os06g31070.1|11976.m07649|protein Protease inhibitor/seed storage/LTP family protein, expressed
	Non-specific lipid transfer protein	2.05649	1078	LOC_Os06g31070.1|11976.m07649|protein Protease inhibitor/seed storage/LTP family protein, expressed
	Serine protease inhibitor	2.93385	11070	LOC_Os03g60840.1|11973.m10972|protein Bowman-Birk serine protease inhibitor family protein, expressed
	Serine protease inhibitor	2.95788	34570	LOC_Os01g03380.1|11971.m06977|protein Bowman-Birk type bran trypsin inhibitor precursor, putative
	Serine protease inhibitor	2.60334	23915	LOC_Os01g03380.1|11971.m06977|protein Bowman-Birk type bran trypsin inhibitor precursor, putative
	Serpin family protein	2.01047	20843	LOC_Os05g43590.1|11975.m08486|protein Serpin family protein
		6.10992	2668	LOC_Os03g41419.1|11973.m09208|protein Serpin family protein, expressed
		5.77792	2452	LOC_Os03g41419.1|11973.m09208|protein Serpin family protein, expressed
		4.85787	12692	LOC_Os03g41419.1|11973.m09208|protein Serpin family protein, expressed
		4.32671	1323	LOC_Os03g41419.1|11973.m09208|protein Serpin family protein, expressed
	Thionin	9.27555	11237	LOC_Os03g03810.1|11973.m05913|protein Gamma-thionin homolog PPT precursor, putative, expressed
	Thionin	6.17827	4345	LOC_Os03g03810.1|11973.m05913|protein Gamma-thionin homolog PPT precursor, putative, expressed
	Thionin	58.9399	8436	LOC_Os02g41910.1|11972.m09228|protein Gamma-thionins family protein, expressed
	Thionin	16.6755	31818	LOC_Os06g32550.1|11976.m07793|protein Plant thionin family protein
	Proteolysis
		2.90501	32253	LOC_Os11g24389.1|11981.m61768|protein Serine carboxypeptidase family protein, expressed
		9.44523	5250	LOC_Os01g61690.1|11971.m12294|protein Serine carboxypeptidase II precursor, putative, expressed
		2.01327	22875	LOC_Os09g21370.1|11979.m05344|protein Papain family cysteine protease containing protein, expressed
		2.02546	21199	LOC_Os09g27930.1|11979.m05944|protein UBiQuitin family member, putative, expressed
		2.38196	22983	LOC_Os06g46770.1|11976.m09203|protein polyubiquitin containing 7 ubiquitin monomers, putative, expressed
		2.01361	14810	LOC_Os01g67950.1|11971.m12899|protein ubiquitin family protein, putative, expressed
		3.64549	2991	LOC_Os01g72210.1|11971.m13256|protein early-responsive to dehydration protein, putative, expressed
	Peroxidase
		4.93907	37131	LOC_Os10g02070.1|11980.m03630|protein Peroxidase N precursor, putative, expressed
		2.01375	8763	LOC_Os07g01410.1|11977.m04621|protein Peroxidase family protein, expressed
		2.56919	1474	LOC_Os06g29470.1|11976.m07491|protein Peroxidase 1 precursor, putative, expressed
		3.64123	29271	LOC_Os01g73220.1|11971.m13351|protein Peroxidase 12 precursor, putative, expressed
		3.91978	32745	LOC_Os01g22370.2|11971.m42991|protein Peroxidase family protein, expressed
	Genes related to cell wall defense
	Inactivation of fungal polygalacturonase	6.50099	17676	LOC_Os03g59330.1|11973.m10831|protein Polygalacturonase family protein, expressed
	Inhibition of fungal glycases	4.7756	14000	LOC_Os02g54190.1|11972.m10448|protein Pectinesterase, putative, expressed
	Degradation of fungal cell walls	2.27242	16583	LOC_Os10g17650.1|11980.m04850|protein Glycosyl hydrolase family 1 protein, expressed
	Degradation of fungal cell walls	3.3518	34987	LOC_Os09g33680.2|11979.m22014|protein Glycosyl hydrolase family 1 protein, expressed
	Degradation of fungal cell walls	2.30704	6881	LOC_Os09g33680.1|11979.m06417|protein Glycosyl hydrolase family 1 protein, expressed
	Degradation of fungal cell walls	2.23474	15615	LOC_Os07g46280.3|11977.m29291|protein Glycosyl hydrolase family 1 protein, expressed
	Degradation of fungal cell walls	2.06045	9014	LOC_Os05g30350.2|11975.m27797|protein Glycosyl hydrolase family 1 protein, expressed
III	Secondary metabolism & detoxification
	Cytochrome P450s	4.28529	15876	LOC_Os10g08319.1|11980.m04183|protein Cytochrome P450 family protein, expressed
	Cytochrome P450s	2.49965	5435	LOC_Os09g28390.1|11979.m05990|protein Cytochrome P450 family protein, expressed
	Cytochrome P450s	2.53597	8592	LOC_Os08g01490.1|11978.m04297|protein Cytochrome P450 71C4, putative, expressed
	Cytochrome P450s	2.82957	17133	LOC_Os04g48460.1|11974.m09782|protein Cytochrome P450 family protein, expressed
	UDP-glycosyltransferase family	2.31771	2354	LOC_Os05g45110.1|11975.m08636|protein UDP-glucoronosyl and UDP-glucosyl transferase family protein
	Glutathione S-transferase	2.15545	4156	LOC_Os03g57200.1|11973.m10639|protein glutathione S-transferase GSTU1, putative, expressed
	Glutathione S-transferase	2.23027	24907	LOC_Os01g72140.1|11971.m13250|protein Glutathione S-transferase, N-terminal domain containing protein, expressed
	Volatile phenylpropanoids	4.35295	2139	LOC_Os05g35290.1|11975.m07759|protein Phenylalanine ammonia-lyase, putative, expressed
	Volatile phenylpropanoids	2.38343	2172	LOC_Os04g43800.1|11974.m09339|protein Phenylalanine ammonia-lyase, putative, expressed
	Volatile phenylpropanoids	2.17435	21183	LOC_Os04g43800.1|11974.m09339|protein Phenylalanine ammonia-lyase, putative, expressed
Group	Nobeoka-bouzu 3 dai Differenctial expressed genes
	Gene classes	Fold Change	Probe ID	Annotation
I	JA and ET related genes
	JA	4.83089	33636	LOC_Os03g07530.3|11973.m34796|protein kelch repeat-containing F-box family protein, putative, expressed
		2.85125	29393	LOC_Os03g07530.3|11973.m34796|protein kelch repeat-containing F-box family protein, putative, expressed
		2.53809	14730	LOC_Os03g07530.3|11973.m34796|protein kelch repeat-containing F-box family protein, putative, expressed
	Lipoxygenase	5.53472	17913	LOC_Os03g49350.1|11973.m09936|protein Lipoxygenase 3, putative, expressed
		2.18902	12436	LOC_Os03g49350.1|11973.m09936|protein Lipoxygenase 3, putative, expressed
	Fatty acid metabolism & derivatives/Lipid metabolism	2.21714	9816	LOC_Os03g16060.1|11973.m07043|protein lipase, putative, expressed
		4.25442	24580	LOC_Os11g43510.1|11981.m08186|protein Lipase family protein, expressed
		6.37805	27927	LOC_Os11g09010.1|11981.m05098|protein Lipase family protein, expressed
		2.5595	13461	LOC_Os01g14080.1|11971.m08014|protein lipase class 3, putative, expressed
	Lipid metabolism/Lipid TAG synthesis	2.41362	21980	LOC_Os09g37100.1|11979.m06658|protein Phospholipase D delta, putative, expressed
		3.41217	26595	LOC_Os04g54200.1|11974.m10312|protein diacylglycerol kinase, putative, expressed
		2.65721	5790	LOC_Os05g49900.1|11975.m09060|protein Fatty acid elongase, putative, expressed
		3.93521	17710	LOC_Os05g49290.3|11975.m27982|protein very-long-chain fatty acid condensing enzyme, putative, expressed
		45.7644	31129	LOC_Os04g48850.1|11974.m09820|protein 1-aminocyclopropane-1-carboxylate synthase, putative, expressed
	Ethylen biosynthesis	5.05521	36839	LOC_Os06g11240.1|11976.m05841|protein 12-oxophytodienoate reductase 2, putative, expressed
		6.94389	37106	LOC_Os06g11210.1|11976.m05838|protein 12-oxophytodienoate reductase 2, putative, expressed
		2.14297	29522	LOC_Os02g54160.1|11972.m10445|protein ethylene response element binding protein, putative, expressed
	Miscellaneous defense related genes
		2.8991	31026	LOC_Os05g43840.1|11975.m08510|protein CBL-interacting serine/threonine-protein kinase 15, putative, expressed
		3.0648	26878	LOC_Os05g04550.1|11975.m04988|protein CBL-interacting serine/threonine-protein kinase 1, putative, expressed
		2.80534	34939	LOC_Os05g04550.1|11975.m04988|protein CBL-interacting serine/threonine-protein kinase 1, putative, expressed
		8.72555	26226	LOC_Os02g02600.1|11972.m05609|protein serine/threonine-protein kinase Cx32, chloroplast precursor, putative, expressed
		5.18934	12289	LOC_Os02g02600.1|11972.m05609|protein serine/threonine-protein kinase Cx32, chloroplast precursor, putative, expressed
		2.07144	16414	LOC_Os03g41460.1|11973.m09212|protein Serine/threonine-protein kinase SAPK9, putative, expressed
		4.00924	804	LOC_Os03g21620.1|11973.m07566|protein Serine/threonine-protein kinase AtPK19, putative, expressed
		2.82575	37771	LOC_Os06g39760.1|11976.m08513|protein Serine-threonine kinase receptor-associated protein, putative, expressed
		2.63877	13559	LOC_Os05g06500.1|11975.m05177|protein universal stress protein family protein, expressed
		3.90808	24292	LOC_Os02g47650.1|11972.m09799|protein pathogen induced protein 2-4, putative, expressed
		8.88363	10647	LOC_Os03g03700.1|11973.m05903|protein MLO protein homolog 1, putative, expressed
	PPIase-cyclophilin-type	2.28826	15735	LOC_Os05g01270.1|11975.m04668|protein peptidyl-prolyl cis-trans isomerase, cyclophilin-type family protein, expressed
	GDSL-lipase
		3.11247	26455	LOC_Os06g34070.1|11976.m07943|protein GDSL-like Lipase/Acylhydrolase family protein, expressed
		9.5536	13587	LOC_Os06g06290.1|11976.m05355|protein GDSL-like Lipase/Acylhydrolase family protein, expressed
		3.57755	9845	LOC_Os06g06290.1|11976.m05355|protein GDSL-like Lipase/Acylhydrolase family protein, expressed
		2.38239	13737	LOC_Os01g11650.1|11971.m07781|protein GDSL-like Lipase/Acylhydrolase family protein, expressed
	Hormone metabolism
	Auxine	2.57922	15987	LOC_Os09g29940.2|11979.m06145|protein Auxin-independent growth promoter, putative, expressed
		2.31796	12309	LOC_Os06g46410.1|11976.m09167|protein auxin response factor 3, putative, expressed
		4.81659	20595	LOC_Os01g60230.3|11971.m97552|protein auxin efflux carrier family protein, putative, expressed
		2.37066	26140	LOC_Os01g60230.3|11971.m97552|protein auxin efflux carrier family protein, putative, expressed
		2.55875	3176	LOC_Os01g08320.1|11971.m07457|protein Auxin-induced protein 22B, putative, expressed
	Gibberellin	11.4439	16072	LOC_Os07g39470.1|11977.m08189|protein Chitin-inducible gibberellin-responsive protein 2, putative, expressed
		11.2981	5930	LOC_Os07g39470.1|11977.m08189|protein Chitin-inducible gibberellin-responsive protein 2, putative, expressed
		6.2231	16631	LOC_Os07g39470.1|11977.m08189|protein Chitin-inducible gibberellin-responsive protein 2, putative, expressed
		3.98581	7128	LOC_Os07g36170.2|11977.m29215|protein Chitin-inducible gibberellin-responsive protein 1, putative, expressed
II	Cysteine-rich Antimicrobial peptides (AMPs)
	Serine protease inhibitor	3.08417	23915	LOC_Os01g03380.1|11971.m06977|protein Bowman-Birk type bran trypsin inhibitor precursor, putative
		2.63752	34570	LOC_Os01g03380.1|11971.m06977|protein Bowman-Birk type bran trypsin inhibitor precursor, putative
	Serine protease inhibitor
	Serpin family protein	3.6592	20843	LOC_Os05g43590.1|11975.m08486|protein Serpin family protein
	Proteolysis
		4.23946	3039	LOC_Os06g24990.1|11976.m07147|protein Xylanase inhibitor protein 1 precursor, putative, expressed
		2.13287	34322	LOC_Os04g26834.1|11974.m07808|protein aspartyl protease family protein, putative, expressed
		57.0115	8036	LOC_Os02g48870.1|11972.m09921|protein Eukaryotic aspartyl protease family protein, expressed
		5.58614	16012	LOC_Os01g56930.1|11971.m11850|protein aspartyl protease family protein, putative, expressed
		4.85669	21397	LOC_Os04g37550.1|11974.m08744|protein Eukaryotic aspartyl protease family protein, expressed
		2.89536	37583	LOC_Os11g08100.1|11981.m05006|protein Eukaryotic aspartyl protease family protein, expressed
		3.37598	31487	LOC_Os08g44640.1|11978.m08436|protein Serine carboxypeptidase family protein, expressed
		2.56514	30916	LOC_Os08g44640.1|11978.m08436|protein Serine carboxypeptidase family protein, expressed
		2.4825	17725	LOC_Os02g46260.4|11972.m34030|protein Serine carboxypeptidase family protein, expressed
		4.83936	5250	LOC_Os01g61690.1|11971.m12294|protein Serine carboxypeptidase II precursor, putative, expressed
		2.84128	31017	LOC_Os01g56150.1|11971.m11771|protein Serine carboxypeptidase S28 family protein, expressed
		3.58472	17512	LOC_Os04g57440.1|11974.m10629|protein Cysteine protease 1 precursor, putative, expressed
		2.11728	22571	LOC_Os04g57440.1|11974.m10629|protein Cysteine protease 1 precursor, putative, expressed
		2.39327	16384	LOC_Os05g51630.2|11975.m27653|protein early-responsive to dehydration protein, putative, expressed
		4.71814	30712	LOC_Os04g35140.1|11974.m08604|protein Subtilisin N-terminal Region family protein, expressed
		4.50882	3368	LOC_Os01g60410.3|11971.m42744|protein Ubiquitin-conjugating enzyme E2-17 kDa, putative, expressed
		2.38487	622	LOC_Os01g60410.3|11971.m42744|protein Ubiquitin-conjugating enzyme E2-17 kDa, putative, expressed
		98.2753	5056	LOC_Os09g27930.1|11979.m05944|protein UBiQuitin family member, putative, expressed
		3.22923	21199	LOC_Os09g27930.1|11979.m05944|protein UBiQuitin family member, putative, expressed
		2.0046	37285	LOC_Os09g27930.1|11979.m05944|protein UBiQuitin family member, putative, expressed
		2.24168	15245	LOC_Os08g08760.1|11978.m05011|protein Ubiquitin family protein
		2.43287	14977	LOC_Os06g46770.1|11976.m09203|protein polyubiquitin containing 7 ubiquitin monomers, putative, expressed
		2.33422	7213	LOC_Os06g46770.1|11976.m09203|protein polyubiquitin containing 7 ubiquitin monomers, putative, expressed
		2.19789	4496	LOC_Os06g46770.1|11976.m09203|protein polyubiquitin containing 7 ubiquitin monomers, putative, expressed
		2.06367	13611	LOC_Os06g46770.1|11976.m09203|protein polyubiquitin containing 7 ubiquitin monomers, putative, expressed
	Peroxidases
		94.6771	19329	LOC_Os07g48050.1|11977.m09020|protein Peroxidase 2 precursor, putative, expressed
		9.56623	14508	LOC_Os07g47990.1|11977.m09014|protein Peroxidase 2 precursor, putative, expressed
		5.70206	32745	LOC_Os01g22370.2|11971.m42991|protein Peroxidase family protein, expressed
		2.77676	18103	LOC_Os03g17690.1|11973.m07194|protein L-ascorbate peroxidase 1, cytosolic, putative, expressed
		2.56961	14428	LOC_Os03g17690.1|11973.m07194|protein L-ascorbate peroxidase 1, cytosolic, putative, expressed
		4.22932	32558	LOC_Os01g19020.1|11971.m08439|protein Peroxidase family protein, expressed
	Genes related to cell wall defense
	Plant cellulose synthesis	2.06409	12417	LOC_Os02g49332.3|11972.m34039|protein cellulose synthase-like protein CslE, putative, expressed
	Inactivation of fungal polygalacturonase	5.32807	12447	LOC_Os11g47350.1|11981.m08515|protein Glycosyl hydrolase family 3 C terminal domain containing protein
		6.28333	34987	LOC_Os09g33680.2|11979.m22014|protein Glycosyl hydrolase family 1 protein, expressed
		3.26385	9014	LOC_Os05g30350.2|11975.m27797|protein Glycosyl hydrolase family 1 protein, expressed
III	Secondary metabolism & detoxification
	UDP-glycosyltransferase family	2.70656	25305	LOC_Os08g31200.1|11978.m07118|protein UDP-glucoronosyl and UDP-glucosyl transferase family protein
	UDP-glycosyltransferase family	3.8306	8460	LOC_Os06g23560.1|11976.m07008|protein UDP-glucoronosyl and UDP-glucosyl transferase family protein, expressed
	UDP-glycosyltransferase family	6.50651	23698	LOC_Os05g51670.2|11975.m27994|protein UDP-glucose 4-epimerase GEPI48, putative, expressed
	UDP-glycosyltransferase family	7.36533	2354	LOC_Os05g45110.1|11975.m08636|protein UDP-glucoronosyl and UDP-glucosyl transferase family protein
	UDP-glycosyltransferase family	4.08219	550	LOC_Os05g29990.1|11975.m07235|protein UDP-D-glucuronate decarboxylase, putative, expressed
	UDP-glycosyltransferase family	5.83944	27074	LOC_Os04g52730.1|11974.m10166|protein UDP-glucose 4-epimerase family protein, expressed
	UDP-glycosyltransferase family	5.51491	17956	LOC_Os04g52730.1|11974.m10166|protein UDP-glucose 4-epimerase family protein, expressed
	UDP-glycosyltransferase family	68.2832	19091	LOC_Os04g44250.1|11974.m09384|protein UDP-glucoronosyl and UDP-glucosyl transferase family protein, expressed
	UDP-glycosyltransferase family	3.16079	35963	LOC_Os03g02670.2|11973.m34768|protein UDP-galactose transporter, putative, expressed
	UDP-glycosyltransferase family	7.87481	2165	LOC_Os01g53350.1|11971.m11503|protein UDP-glucoronosyl and UDP-glucosyl transferase family protein, expressed
	UDP-glycosyltransferase family	3.6369	4225	LOC_Os03g37010.1|11973.m08814|protein glycosyltransferase, putative, expressed
	UDP-glycosyltransferase family	3.1191	14884	LOC_Os03g37010.1|11973.m08814|protein glycosyltransferase, putative, expressed
	UDP-glycosyltransferase family	5.38027	1326	LOC_Os02g41520.1|11972.m09188|protein Glycosyl transferase family 8 protein, expressed
	UDP-glycosyltransferase family	2.63604	31469	LOC_Os02g41520.1|11972.m09188|protein Glycosyl transferase family 8 protein, expressed
	UDP-glycosyltransferase family	2.26291	1422	LOC_Os02g41520.1|11972.m09188|protein Glycosyl transferase family 8 protein, expressed
	UDP-glycosyltransferase family	2.07892	36196	LOC_Os02g03850.2|11972.m05734|protein Glycosyl transferase family, a/b domain containing protein, expressed
	UDP-glycosyltransferase family	6.91551	24392	LOC_Os01g02920.1|11971.m06931|protein glycosyltransferase, putative, expressed
	Glutathione S-transferase	3.35529	195	LOC_Os12g10730.2|11982.m05056|protein Glutathione S-transferase, putative, expressed
	Glutathione S-transferase	2.13318	35431	LOC_Os12g10730.2|11982.m05056|protein Glutathione S-transferase, putative, expressed
	Glutathione S-transferase	6.16153	8674	LOC_Os12g02960.1|11982.m04294|protein Glutathione S-transferase, C-terminal domain containing protein, expressed
	Glutathione S-transferase	2.49273	27708	LOC_Os11g37730.1|11981.m07618|protein Glutathione S-transferase, N-terminal domain containing protein, expressed
	Glutathione S-transferase	3.22699	9219	LOC_Os09g29200.1|11979.m06071|protein Glutathione S-transferase, N-terminal domain containing protein, expressed
	Glutathione S-transferase	3.6821	11686	LOC_Os07g28480.1|11977.m07120|protein glutathione S-transferase GSTU1, putative, expressed
	Glutathione S-transferase	2.66407	3141	LOC_Os03g57200.1|11973.m10639|protein glutathione S-transferase GSTU1, putative, expressed
	Glutathione S-transferase	2.43764	4156	LOC_Os03g57200.1|11973.m10639|protein glutathione S-transferase GSTU1, putative, expressed
	Glutathione S-transferase	3.94534	19603	LOC_Os02g35590.1|11972.m08647|protein Glutathione S-transferase zeta-class 1, putative, expressed
	Glutathione S-transferase	19.7963	15597	LOC_Os02g21460.1|11972.m07386|protein glutathione S-transferase, putative, expressed
	Glutathione S-transferase	6.8847	24907	LOC_Os01g72140.1|11971.m13250|protein Glutathione S-transferase, N-terminal domain containing protein, expressed
	Glutathione S-transferase	3.50809	6100	LOC_Os01g55830.2|11971.m42727|protein glutathione S-transferase GSTF2, putative, expressed
	Glutathione S-transferase	13.8305	4024	LOC_Os01g27260.1|11971.m09177|protein glutathione S-transferase GSTF1, putative, expressed
	Glutathione S-transferase	9.19833	7492	LOC_Os01g25386.1|11971.m09002|protein glutathione-conjugate transporter, putative, expressed
	Glutathione S-transferase	2.5733	9517	LOC_Os05g35274.5|11975.m64242|protein Galactosyltransferase family protein, expressed
		3.50318	14139	LOC_Os04g44870.1|11974.m09443|protein Elicitor-responsive protein 3, putative, expressed
		18.1129	25957	LOC_Os04g44240.1|11974.m09383|protein Cytokinin-O-glucosyltransferase 3, putative, expressed
		3.29601	3562	LOC_Os03g50860.1|11973.m10071|protein cytokinin receptor CRE1b, putative, expressed
		4.83574	14759	LOC_Os02g36840.1|11972.m08771|protein Cytokinin-O-glucosyltransferase 2, putative, expressed
		7.03363	6320	LOC_Os05g35200.1|11975.m07750|protein secondary cell wall-related glycosyltransferase family 8, putative, expressed
		3.87255	34402	LOC_Os01g65780.3|11971.m42775|protein secondary cell wall-related glycosyltransferase family 8, putative, expressed
		3.07721	26682	LOC_Os01g65780.3|11971.m42775|protein secondary cell wall-related glycosyltransferase family 8, putative, expressed
	Volatile phenylpropanoids	2.92287	37480	LOC_Os02g41650.2|11972.m33782|protein Phenylalanine ammonia-lyase, putative, expressed
	Volatile phenylpropanoids	2.12068	16168	LOC_Os02g41650.2|11972.m33782|protein Phenylalanine ammonia-lyase, putative, expressed
	Volatile phenylpropanoids	2.07168	15524	LOC_Os02g41630.3|11972.m33418|protein Phenylalanine ammonia-lyase, putative, expressed
	Flavonoids	2.68185	33291	LOC_Os02g52840.1|11972.m10314|protein Flavonol synthase/flavanone 3-hydroxylase, putative, expressed
	Cytochrome P450s	30.4589	16347	LOC_Os12g32850.1|11982.m07084|protein Cytochrome P450 71E1, putative
	Cytochrome P450s	17.0163	1186	LOC_Os12g05440.1|11982.m04537|protein Cytochrome P450 family protein, expressed
	Cytochrome P450s	8.34701	32344	LOC_Os09g36080.1|11979.m06558|protein Cytochrome P450 family protein, expressed
	Cytochrome P450s	3.17539	18104	LOC_Os08g37432.2|11978.m26847|protein MATE efflux family protein, expressed
	Cytochrome P450s	2.06616	32372	LOC_Os08g03682.1|11978.m04512|protein Cytochrome P450 family protein, expressed
	Cytochrome P450s	3.2058	10052	LOC_Os07g12830.2|11977.m29108|protein Cytochrome b5-like Heme/Steroid binding domain containing protein, expressed
	Cytochrome P450s	6.69793	16870	LOC_Os05g41440.2|11975.m27896|protein Cytochrome P450 98A1, putative, expressed
	Cytochrome P450s	2.66596	11964	LOC_Os05g34770.1|11975.m07707|protein Cytochrome c, putative, expressed
	Cytochrome P450s	2.94334	27672	LOC_Os04g55960.1|11974.m10487|protein NADPH-cytochrome P450 reductase, putative, expressed
	Cytochrome P450s	3.3143	34489	LOC_Os04g48460.2|11974.m35189|protein Cytochrome P450 family protein, expressed
	Cytochrome P450s	2.3869	14062	LOC_Os04g48460.1|11974.m09782|protein Cytochrome P450 family protein, expressed
	Cytochrome P450s	2.68554	21674	LOC_Os03g12500.1|11973.m06700|protein Cytochrome P450 74A2, putative, expressed
	ABC transporter	4.77053	28601	LOC_Os05g02890.1|11975.m04824|protein ABC transporter family protein, putative, expressed
	ABC transporter	3.02182	4900	LOC_Os05g02890.1|11975.m04824|protein ABC transporter family protein, putative, expressed
	ABC transporter	6.26008	13164	LOC_Os03g32630.1|11973.m08505|protein ABC transporter family protein, expressed
	ABC transporter	4.93365	21173	LOC_Os03g32630.1|11973.m08505|protein ABC transporter family protein, expressed
	ABC transporter	2.41847	36034	LOC_Os02g56550.1|11972.m10677|protein ABC transporter family protein, expressed
	MDR	5.50375	11222	LOC_Os05g10730.1|11975.m05543|protein multidrug resistance associated protein 1, putative, expressed
Group	Nobeoka-bouzu 7 dai Differenctial expressed genes
	Gene classes	Fold Change	Probe ID	Annotation
I	JA and ET related genes
	Lipoxygenase	2.14105	1076	LOC_Os03g49380.3|11973.m35371|protein Lipoxygenase 3, putative, expressed
	Lipoxygenase	2.13632	27579	LOC_Os03g49380.3|11973.m35371|protein Lipoxygenase 3, putative, expressed
	Lipoxygenase	2.03394	8762	LOC_Os03g49380.3|11973.m35371|protein Lipoxygenase 3, putative, expressed
	Lipid metabolism	2.18956	33349	LOC_Os02g17390.1|11972.m06982|protein Peroxisomal fatty acid beta-oxidation multifunctional protein, putative, expressed
	Lipid metabolism	14.2018	7118	LOC_Os01g62010.1|11971.m12324|protein Monoglyceride lipase, putative, expressed
	GDSL-lipase
		2.55983	1380	LOC_Os06g06250.1|11976.m05351|protein GDSL-like Lipase/Acylhydrolase family protein, expressed
		2.35322	30626	LOC_Os05g44200.1|11975.m08546|protein GDSL-like Lipase/Acylhydrolase family protein, expressed
II	Proteolysis
		2.00592	14362	LOC_Os03g41419.1|11973.m09208|protein Serpin family protein, expressed
	Serine protease inhibitor
		2.28998	4740	LOC_Os03g27590.1|11973.m08086|protein Serine carboxypeptidase family protein, expressed
III	Secondary metabolism & detoxification
	Cytochrome P450s	2.3708	20587	LOC_Os09g38620.1|11979.m06803|protein NADPH-cytochrome P450 reductase, putative, expressed
	Cytochrome P450s	2.48464	988	LOC_Os03g55800.1|11973.m10491|protein Cytochrome P450 74A1, chloroplast precursor, putative, expressed
		2.80869	8322	LOC_Os03g37490.1|11973.m08858|protein MATE efflux family protein, expressed
	ABC transporter	2.46516	32845	LOC_Os04g52900.1|11974.m10183|protein ABC transporter, putative, expressed
	Glutathione S-transferase	2.66345	17633	LOC_Os12g34380.1|11982.m07232|protein Glutathione synthetase, chloroplast precursor, putative, expressed
		2.3098	28817	LOC_Os07g44290.1|11977.m08650|protein CBL-interacting serine/threonine-protein kinase 1, putative, expressed
		5.15813	33465	LOC_Os07g17010.1|11977.m06142|protein Chalcone and stilbene synthases, N-terminal domain containing protein, expressed
		2.41636	35594	LOC_Os05g05620.1|11975.m05089|protein glutathione S-transferase GSTF1, putative, expressed
		2.13995	13158	LOC_Os03g43440.1|11973.m09390|protein CBL-interacting serine/threonine-protein kinase 11, putative, expressed

## Sheet: Table S4
Table S4. In silico analysis of genotype-specific and resistance-related genes. The chromosomes location of genes were identified by using available wheat genome database.
Gamenya
Probe ID	Annotation	Fold change	% Identity	E-value	Chr location	Time points
2380	nsLTP	57.7	100	5.5e-53	7DS	3 dai
11751		41.9	100	5.5e-53	7DS
23363	Plant thionin	189.2	98.47	8.1e-108	1BL
14475		154.7	98.58	1.9e-118	1AL
2756		95.3	99.32	2.3e-119	1BL
Sumai 3
27539	nsLTP	6.3	100	2.6e-169	1DS	7 dai
18237		3.9	94,71	3.3e-136	4AL
16375		3.7	95,60	2.2e-101	1BS
37734		3.6	98,75	0	1DS
8345		2.8	95,65	4.5e-149	1BS
17008		2.7	100	0	5BS
9839		2.5	98,89	1e-155	4AL
26101		3.5	95,69	3.9e-176	4AL
14455		2.4	99,30	0	5DS
31962		2.2	100	0	5BS
1078		2.1	99,12	0	5AS
31128	ACC	2.1	99,29	5.4e-183	1BS
31818	Plant thionin	16.7	100	2.2e-92	1DL
30746	Gamma-thionin	12.6	100	1.8e-61	3DL	3 dai
18008		6.8	No hit
14550		3.6	No hit
12683		2.3	91,04	3e-56	4DL
30628		2.1	99,71	1.2e-96	3AL
11237		9.3	92.11	2.2e-81	5BL	7 dai
4345		6.2	3.6e-87	100	4DL
8436		58.9	2.7e-105	100	1DS
25890	Peroxidase	3.2	100	3.5e-235	2BS
25882		2.4	96,67	4.6e-238	3AS
Nobeokabouzu-komugi
31129	ACC	45.8	98,78	0	2AL	3 dai
26455	GDSL-like lipase	3.1	98,16	9.7e-213	7DL
13587		9.6	85,51	1.4e-120	1DL
9845		3.6	85,51	1.4e-120	1DL
13737		2.4	94,05	9.2e-166	3B
14508	Peroxidase	9.6	100	2.3e-102	2AS
19329		94.7	99.83	1.3e-127	2BS
32558		4.2	98.97	3.1e-134	7AL
32745		5.7	99.31	1.4e-93	2AS
25305	UGTs	2.7	99,83	1.7e-126	4AL
8460		3.8	95,80	2.3e-157	7AL
23698		6.5	97,83	1.1e-185	1AL
2354		7.4	78,89	1.6e-138	2AL
550		4.1	98,89	4.2e-164	1DL
27074		5.8	98,63	2.4e-230	2DL
17956		5.5	98,63	2.4e-230	2DL
19091		68.3	93,39	6.5e-193	2DL
35963		3.2	99,89	5.6e-153	5AL
2165		7.9	90,87	3.7e-133	1DL
4225		3.6	98,72	0	1BL
14884		3.1	100	0	1BL
1326		5.4	98,41	2.8e-201	6BL
31469		2.6	98,43	2.8e-201	6BL
1422		2.3	100	1.1e-271	2DL
36196		2.1	100	0	6DS
24392		6.9	93,91	9.6e-231	3B
28601	ABC transporter	4.8	100	0	1DS
4900		3	100	0	1DS
13164		6.3	97,37	4.3e-288	3DL
21173		4.9	89,93	0	3B
36034		2.4	90,34	4.5e-120	6AL
32845		2.5	94,19	0	2BL	7 dai
33349	Lipid metabolism	2.2	100	5.7e-55	3B
7118	Lipase	14.2	100	4.1e-54	3B
1076	LOX	2.1	100	5.4e-128	4BS
27579		2.1	100	2.6e-155	4DS
8762		2	99.34	1.8e-126	4DS
Probe ID	Annotation	Fold change
		Sumai 3	Nobeokabouzu-komugi	% Identity	E-value	Chr location
117	UGTs	4	38.8	99.73	1.9e-162	5BL
15510		8.9	409.8	96	4e-56	2BS
21965	MRP	4.3	20.3	99.39	4.2e-139	3B
55		9.7	31.4	99.53	4.2e-137	3B
8976		4.8	13.6	99.54	8.2e-132	3B
25024	PDR5 like ABC transporter	4.8	11.1	100	0	3DL
17151		3.4	11.7	96,72	1.3e-236	2AS
