# Supplementary material for: Altered Gene Expression Profiles of Wheat Genotypes against Fusarium Head Blight
Source: MDPI journal article supplement (doi:10.3390/toxins7020604), 2015-02-16
Supplement: s2 [file s2]

# Supplementary Information

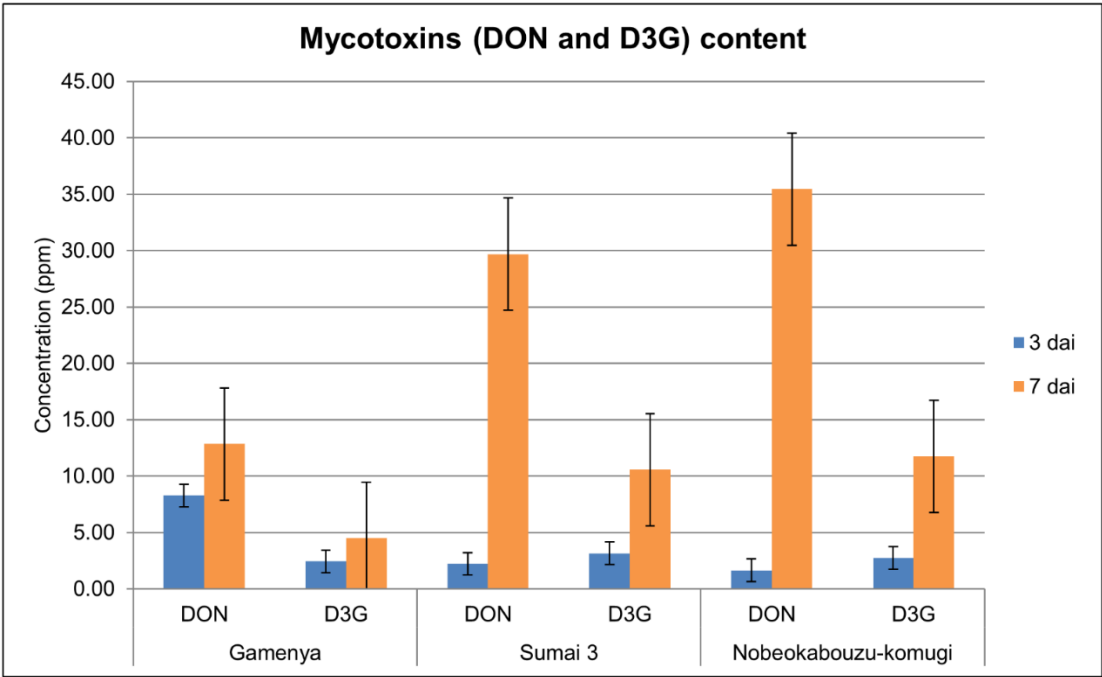

**Figure S1.** Mycotoxins (DON and D3G) content in three wheat genotypes. DON (deoxynivalenol) and D3G (DON-3-glucoside) concentration in treated samples of Gamenya, Sumai 3 and Nobeokabouzu-komugi at three and seven days after inoculation (dai).

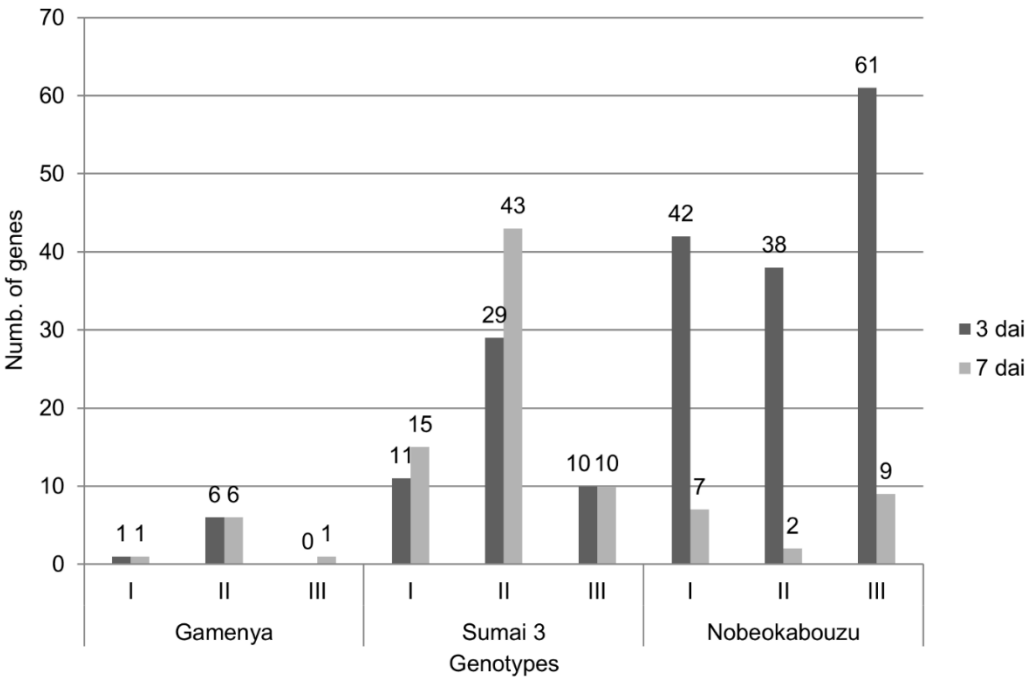

**Figure S2.** Number of wheat *F. graminearum*-responsive genes related to systemic defense (I), localized defense (II) and detoxification process (III) in three genotypes. dai, days after inoculation.
